1 **Full title:**

2 **The phagocytosis oxidase/Bem1p (PB1) domain-containing protein PB1CP negatively**  
3 **regulates the NADPH oxidase RBOHD in plant immunity**

4

5 **Authors:**

6 Yukihiisa Goto <sup>1,2</sup>, Noriko Maki <sup>1</sup>, Jan Sklenar <sup>3</sup>, Paul Derbyshire <sup>3</sup>, Frank L.H. Menke <sup>3</sup>, Cyril  
7 Zipfel <sup>3,4</sup>, Yasuhiro Kadota <sup>1</sup>, Ken Shirasu <sup>1,2</sup>

8

9 **Affiliations:**

10 <sup>1</sup> RIKEN Center for Sustainable Resource Science (CSRS), Plant Immunity Research Group,  
11 Suehiro-cho 1-7-22 Tsurumi-ku, Yokohama, Kanagawa, 230-0045, Japan

12 <sup>2</sup> Graduate School of Science, The University of Tokyo, 7-3-1, Hongo, Bunkyo-ku, Tokyo, 113-  
13 8654, Japan

14 <sup>3</sup> The Sainsbury Laboratory, Norwich Research Park, Norwich NR4 7UH, United Kingdom

15 <sup>4</sup> Department of Molecular and Cellular Plant Physiology, University of Zurich, Zollikerstrasse  
16 107, CH-8008 Zurich, Switzerland

17

18 **Authors for correspondence:**

19 Yasuhiro Kadota, Tel: +81-45-503-9574, Email: [yasuhiro.kadota@riken.jp](mailto:yasuhiro.kadota@riken.jp)

20 Ken Shirasu, Tel: +81-45-503-9574, Email: [ken.shirasu@riken.jp](mailto:ken.shirasu@riken.jp)

21

22 Total word count (Introduction, Materials and Methods, Results, and Discussion): 5925.

23 Word count for each section (Introduction: 1004, Materials and Methods: 1677, Results: 1937,  
24 and Discussion: 1307)

25

26 Number of figures: 7

27 Number of tables: 1

28 Supporting information (10 Supplemental figures, 3 Supplemental tables, 2 Supplemental  
29 movies)

30 **Summary**

- 31 ● Perception of pathogen-associated molecular patterns (PAMPs) by surface-localized pattern-  
32 recognition receptors activates RESPIRATORY BURST OXIDASE HOMOLOG D  
33 (RBOHD) through direct phosphorylation by BOTRYTIS-INDUCED KINASE 1 (BIK1)  
34 and induces the production of reactive oxygen species (ROS). ROS have direct antimicrobial  
35 properties but also serve as signaling molecules to activate additional defense responses such  
36 as stomatal closure. RBOHD activity must be tightly controlled to avoid the detrimental  
37 effects of ROS, but little is known about RBOHD downregulation.
- 38 ● To better understand the regulation of RBOHD, we used co-immunoprecipitation of RBOHD  
39 coupled with mass spectrometry analysis to identify RBOHD-associated proteins.
- 40 ● Among RBOHD-associated proteins, we identified PHAGOCYTOSIS OXIDASE/ BEM1P  
41 (PB1) DOMAIN-CONTAINING PROTEIN (PB1CP). We found that PB1CP negatively  
42 regulates RBOHD and the resistance against the fungal pathogen *Colletotrichum*  
43 *higginsianum*. PB1CP directly interacts with RBOHD *in vitro*, and PAMP treatment increases  
44 the interaction *in vivo*. PB1CP is localized at the cell periphery and in cytoplasm, but PAMP  
45 treatment induces PB1CP relocalization to small endomembrane compartments. *PB1CP*  
46 overexpression reduces plasma membrane localization of RBOHD, suggesting that PB1CP  
47 down-regulates RBOHD function by relocalizing it away from the plasma membrane.
- 48 ● We reveal a novel negative regulation mechanism of ROS production through the  
49 relocalization of RBOHD by PB1CP.

50

51 **Keywords:** Arabidopsis, pattern-triggered immunity (PTI), NADPH oxidase RBOHD, reactive  
52 oxygen species (ROS), pathogen-associated molecular patterns (PAMPs)

## 53 **Introduction**

54 The production of reactive oxygen species (ROS) is an immune response against infection that is  
55 well-conserved across biological kingdoms. ROS not only have antimicrobial activities, but they  
56 also act as signaling molecules to induce additional immune responses (Lambeth *et al.*, 2000).  
57 Excessive ROS production can have detrimental effects on cellular functions by damaging DNA,  
58 proteins, lipids, and other macromolecules (Lorrain, 2003; Moeder & Yoshioka, 2008). As such,  
59 ROS production must be produced in the right amount and place, and at the right time to minimize  
60 cellular damage.

61 NADPH oxidases (NOXs) are highly conserved plasma- and endo-membrane enzymes  
62 that play a crucial role in ROS production in plants, animals, and fungi (Segal, 2016). NOXs  
63 transfer electrons from cytosolic NADPH or NADH to apoplastic oxygen, leading to the  
64 production of superoxide ( $O_2^-$ ).  $O_2^-$  can then be converted to hydrogen peroxide ( $H_2O_2$ ) by  
65 superoxide dismutases (Suzuki *et al.*, 2011; Marino *et al.*, 2012; Kadota *et al.*, 2015). In animals,  
66 the activity of NOX proteins is tightly controlled by regulatory proteins and  $Ca^{2+}$ . The 91-kD  
67 glycoprotein subunit of phagocyte oxidase (GP91<sup>phox</sup>), also known as NADPH oxidase 2 (NOX2),  
68 is the best-characterized NOX. NOX2 forms a heterodimer with the membrane protein p22<sup>phox</sup>  
69 and together they bind to the cytosolic regulators p47<sup>phox</sup>, p67<sup>phox</sup>, p40<sup>phox</sup>, and the small GTPase  
70 Rac. Interaction with these regulators leads to the activation of NOX2 (Canton & Grinstein,  
71 2014). Mutations in NOX2 or its regulatory proteins cause chronic granulomatous disease in  
72 which patients suffer from chronic or recurrent bacterial and fungal infections due to the absence  
73 of an oxygen burst (Bedard & Krause 2007), thus showing the crucial role that NOXs play in  
74 immunity. In contrast to NOX2, NOX5 and DUOX have additional EF-hand motifs at the N-  
75 terminal domain (ND), suggesting their regulation by  $Ca^{2+}$ -binding (Canton & Grinstein 2014).  
76 In addition, calcium-dependent kinases, such as protein kinase C $\alpha$  and  $Ca^{2+}$ /calmodulin-  
77 dependent protein kinase II, are known to phosphorylate and activate NOX5 and DUOX.

78 In plants, NOXs belong to the respiratory burst oxidase homolog (RBOH) family, which  
79 contains ten members in *Arabidopsis thaliana* (Torres & Dangl 2005; Kadota *et al.*, 2015). Among  
80 RBOHs, RBOHD plays a particularly crucial role in immunity and stress responses. RBOHD-  
81 produced ROS are required for the induction of numerous defense responses, including callose  
82 deposition, stomatal closure, and systemic acquired resistance (Mishina & Zeier, 2007; Suzuki *et*  
83 *al.*, 2013; Ross *et al.*, 2014; Mittler & Blumwald, 2015). Recent studies have clarified the RBOHD  
84 activation mechanisms that are triggered after the perception of pathogen-associated molecular  
85 patterns (PAMPs) by surface-localized pattern recognition receptors (PRRs). Activated RBOHD  
86 induces PAMP-induced ROS production as one of the readouts in so-called pattern-triggered  
87 immunity (PTI) (Kadota *et al.*, 2014; Li *et al.*, 2014). Leucine-rich repeat receptor kinases (LRR-  
88 RKs) EFR and FLS2, which are the PRRs for the immunogenic peptides of bacterial EF-Tu or

89 flagellin (elf18 or flg22), respectively, induce instantaneous association with the coreceptor LRR-  
90 RK BAK1. The PRR complex interacts directly with, and phosphorylates receptor-like  
91 cytoplasmic kinases (RLCKs) such as BOTRYTIS INDUCED KINASE 1 (BIK1). RBOHD  
92 forms a complex with EFR and FLS2, and phosphorylated BIK1 interacts directly with, and  
93 phosphorylates specific residues at the N-terminal domain (ND) of RBOHD, which is required  
94 for RBOHD activation (Kadota *et al.*, 2014; Li *et al.*, 2014). In addition to the regulation by  
95 RLCKs, Ca<sup>2+</sup>-based regulation is also required for RBOHD activation. PAMP perception by PRRs  
96 activates plasma membrane Ca<sup>2+</sup> channels such as OSCA1.3 and the cyclic nucleotide-gated  
97 channel (CNGC) proteins CNGC2 and CNGC4 (at least under specific Ca<sup>2+</sup> concentrations)  
98 through BIK1, which lead to the influx of Ca<sup>2+</sup> (Tian *et al.*, 2019; Thor *et al.*, 2020). Ca<sup>2+</sup> in turn  
99 activates RBOHD through Ca<sup>2+</sup> binding to the EF-hand motif in RBOHD-ND as well as through  
100 phosphorylation by Ca<sup>2+</sup>-dependent protein kinases (CPKs). Like NOX2, small GTPase Rac binds  
101 to the ND of the RBOHD homolog in rice, which is important for ROS production (Wong *et al.*,  
102 2007). Although RBOHs and NOX2 are structurally similar, none of the known NOX2 regulators  
103 has a RBOH regulatory function in plants, except for RAC.

104         How RBOHD activity is down-regulated is not well understood. Endocytosis and  
105 vacuolar degradation are known to decrease membrane proteins and their activity of the  
106 downstream signaling pathways. For example, many PRRs are endocytosed after ligand  
107 perception through the clathrin-mediated pathway (Robatzek *et al.*, 2006; Mbengue *et al.*, 2016).  
108 Similar to PRRs, RBOHD is also endocytosed under salt stress (Hao *et al.*, 2014), suggesting the  
109 involvement of endocytosis in down-regulating RBOHD activity. Interestingly, PBL13, an RLCK,  
110 phosphorylates the C-terminal domain (CD) of RBOHD, which triggers the ubiquitination of  
111 RBOHD by PIRE (PBL13-INTERACTING RING DOMAIN E3 LIGASE) (Lee *et al.*, 2020a).  
112 Because PIRE-mediated ubiquitination of RBOHD lowers RBOHD levels, ubiquitination may  
113 serve as a signal for endocytosis and vacuolar degradation. However, it is not clear whether  
114 endocytosis or vacuolar degradation of RBOHD are induced as a mechanism to halt PAMP-  
115 induced ROS production.

116         In this work, we identify phagocytosis oxidase/Bem1p (PB1) domain-containing  
117 protein (PB1CP) as a novel negative regulator of RBOHD. The PB1 domain is conserved in  
118 animal NOX2 regulators p40<sup>phox</sup> and p67<sup>phox</sup>, and plays important roles for their assembly with  
119 NOX2, as well as its activation, suggesting that there is cross-kingdom conservation of functional  
120 domains among NOX regulators. In contrast to the positive regulation of p40<sup>phox</sup> and p67<sup>phox</sup>,  
121 PB1CP negatively regulates PAMP-induced ROS production as well as resistance against the  
122 fungal pathogen *Colletotrichum higginsianum*. PB1CP directly interacts with RBOHD and  
123 competes with BIK1 for binding. PAMP treatment induces direct interaction between PB1CP and  
124 RBOHD, suggesting that PB1CP specifically interacts with the activated form of RBOHD.

125 PB1CP localizes at the cell periphery and the cytoplasm, but PAMP treatment results in the  
126 accumulation of PB1CP within small endomembrane compartments. In addition, *PB1CP*  
127 overexpression reduces the plasma membrane localization of RBOHD, suggesting that PB1CP  
128 relocalizes RBOHD from the plasma membrane to small endomembrane compartments. Co-  
129 treatment with PAMP and cycloheximide (CHX), a protein synthesis inhibitor, results in  
130 localization of RBOHD to dot-like PB1CP endomembrane compartments. These data suggest a  
131 novel negative regulation mechanism of ROS production through PB1CP-mediated relocalization  
132 of RBOHD.

## 133 **Materials and Methods**

### 134 Plant materials and growth conditions

135 Seeds of *Arabidopsis* (*Arabidopsis thaliana*) ecotype Columbia (Col-0), T-DNA insertion mutant  
136 of *pblcp-1* (SALK\_036544), and *pblcp-2* (SALK\_207053) were sown on soil or half-strength  
137 Murashige-Skoog media containing 1 % sucrose. After two days of cold treatment to break seed  
138 dormancy, plants were grown under short-day photoperiods (8 h light/16 h dark) at 23 °C. Liquid  
139 culture seedlings were grown under continuous light at 23 °C. T-DNA insertion lines were  
140 genotyped using primers listed in Table S3.

141

### 142 Vector construction and generation of transgenic lines

143 The CDS region of *PB1CP* was amplified by PCR with KoD FX neo (Toyobo, Japan), and the  
144 resulting PCR product was cloned into the epiGreenB5 (3×HA) and epiGreenB(eGFP) vectors  
145 between the *ClaI* and *BamHI* restriction sites with an In-Fusion HD Cloning Kit (Clontech, USA)  
146 to generate epiGreenB5-Cauliflower mosaic virus (CaMV) *p35S::PB1CP-3×HA* and epiGreenB-  
147 CaMV *p35S::PB1CP-3-eGFP* for transient expression assays in *Nicotiana benthamiana* and for  
148 stable transformation of *Arabidopsis* (Nekrasov *et al.*, 2009). All of the other genes encoding  
149 candidate RBOHD-associated proteins were cloned into epiGreenB5 by the same strategy using  
150 an In-Fusion HD Cloning Kit (Clontech, USA). To generate epiGreenB-*pPB1CP::PB1CP-3-*  
151 *eGFP* for transient expression in *N. benthamiana*, amplicon containing the 2000-bp promoter  
152 upstream of start codon and coding regions of *PB1CP* was cloned into epiGreenB (eGFP) between  
153 the *EcoRI* and *BamHI* restriction sites (Nekrasov *et al.*, 2009). To generate epiGreenB-CaMV  
154 *p35S::mScarlet-RBOHD*, the coding regions of *RBOHD* and mScarlet were amplified by PCR  
155 and cloned into the epiGreenB5 between *ClaI* and *BamHI* restriction sites. *Arabidopsis* stable  
156 transgenic lines of *p35S::PB1CP-3×HA* were generated based on the floral drop (Clough & Bent,  
157 1998) or floral dip (Martinez-Trujillo *et al.*, 2004) methods as described previously. PCR primers  
158 for these constructs are listed in Table S3.

159

### 160 Protein extraction and co-immunoprecipitation

161 Protein extraction and immunoprecipitation were performed as described previously (Kadota *et*  
162 *al.*, 2014, 2016) with minor modifications. Ten grams fresh weight of seedlings were used for  
163 large-scale immunoprecipitation to identify RBOHD-associated proteins, and two grams were  
164 used for directed co-immunoprecipitations. After seedlings were ground in liquid nitrogen with  
165 sand (Sigma-Aldrich), extraction buffer (50 mM Tris-HCl, pH 7.5, 150 mM NaCl, 10 % glycerol,  
166 5 mM DTT, 2.5 mM NaF, 1 mM Na<sub>2</sub>MoO<sub>4</sub> · 2H<sub>2</sub>O, 0.5 % [w/v] polyvinylpyrrolidone, 1 % [v/v]  
167 P9599 Protease Inhibitor Cocktail (Sigma-Aldrich), 100 μM phenylmethylsulphonyl fluoride and  
168 2 % [v/v] IGEPAL CA-630 (Sigma-Aldrich), 2 mM EDTA and 1 % [v/v] protein phosphatase

169 inhibitor cocktail 2 and 3 (Sigma-Aldrich)) were added at a concentration of 2 mL/g tissue powder.  
170 Samples were incubated at 4 °C for 1 h and clarified by several centrifugations at 13,000 rpm for  
171 20 min at 4 °C. Supernatant protein concentrations were adjusted to 5 mg/mL and incubated for  
172 2 h at 4 °C with 200 µL of anti-FLAG matrix (Sigma-Aldrich) for co-immunoprecipitation with  
173 FLAG-RBOHD and with 200 µL of anti-HA magnetic beads (Miltenyi Biotec) for co-  
174 immunoprecipitation with PB1CP-HA. Beads were then washed three times with extraction  
175 buffer. FLAG peptides were used for the elution of FLAG-RBOHD to eliminate non-specific  
176 interactions with the beads. PB1CP-HA was eluted with boiled sodium dodecyl sulfate (SDS)  
177 sample buffer.

178

179 Protein identification by LC-MS/MS

180 The identification of proteins by LC-MS/MS was performed as previously described (Ntoukakis  
181 *et al.*, 2009; Kadota *et al.*, 2014). In brief, proteins were separated by SDS-PAGE (NuPAGE®,  
182 Invitrogen) and after staining with Coomassie Brilliant Blue (CBB) (SimplyBlue™ stain,  
183 Invitrogen), the proteins were excised from the gel and digested with trypsin. LC-MS/MS analysis  
184 was performed using a LTQ-Orbitrap mass-spectrometer (Thermo Scientific) and a nanoflow-  
185 HPLC system (nanoAcquity; Waters) as described previously (Ntoukakis *et al.*, 2009). The  
186 TAIR10 database ([www.Arabidopsis.org](http://www.Arabidopsis.org)) using the Mascot algorithm (Matrix Science). The  
187 Scaffold program (Proteome Software) was used to validate MS/MS-based peptide and protein  
188 identifications and to annotate spectra.

189

190 Transient expression in *N. benthamiana*

191 *Agrobacterium tumefaciens* AGL1 strains carrying the binary expression vectors were grown in  
192 LB medium supplemented with the appropriate antibiotics. Cultures were pelleted by  
193 centrifugation and re-suspended in buffer containing 10 mM MgCl<sub>2</sub>, 10 mM MES pH 5.6, and  
194 100 µM acetosyringone to a concentration with OD<sub>600</sub> = 0.3 and incubated for 3 h at room  
195 temperature. *Agrobacterium* strains were syringe-infiltrated into the same leaf.

196

197 ROS burst assay

198 A ROS burst assay was performed as described previously (Kadota *et al.*, 2014). ROS production  
199 in *N. benthamiana* was induced with 1 µM flg22, and measured using 8 leaf discs three days after  
200 Agroinfiltration. Candidate-associated proteins of RBOHD and GUS were expressed in the same  
201 leaves, and ROS production was compared to measure the effect of the candidate on flg22-  
202 induced ROS production. For ROS burst assay in Arabidopsis, eight leaf discs from four- to six-  
203 week-old soil-grown plants (three plants per genotype, 24 leaf discs in total) were used. Discs  
204 were punched out of leaves using a cork borer, then floated overnight on sterile water. The water



205 was replaced with a reaction solution containing the chemiluminescent probe Luminol (Wako,  
206 Japan) at 400 nM or L-012 (Wako, Japan) at 1  $\mu$ M, horseradish peroxidase (HRP) at 20 g/ml  
207 (Sigma-Aldrich, USA), and one of the PAMPs (1  $\mu$ M flg22, 1  $\mu$ M elf18, or 10  $\mu$ M chitin).  
208 Luminescence was measured over 30 min with a Tristar<sup>2</sup> multimode reader (Berthold  
209 Technologies, Germany).

210

#### 211 Quantitative RT-PCR (RT-qPCR)

212 RT-qPCR was performed as described previously (Kadota *et al.*, 2019). Total RNA was extracted  
213 from 2-week-old Arabidopsis seedlings using an RNeasy Plant Mini Kit (Qiagen, Germany)  
214 according to the manufacturer's instructions. RNA was reverse transcribed with a ReverTraAce  
215 qPCR RT Kit (Toyobo, Japan) according to the manufacturer's instructions. One  $\mu$ g of total RNA  
216 was used as a template for cDNA synthesis. RT-qPCR was carried out using Thunderbird SYBR  
217 qPCR Mix (Toyobo, Japan) with a Stratagene mx 3000p real-time thermal cycler (Agilent, USA).  
218 Relative transcript levels were calculated against a standard curve with normalization to the  
219 expression of *PLANT U-BOX PROTEIN1 (PUB1)* gene (*AT5G15400*, Azevedo *et al.*, 2001).  
220 Primers used for the RT-qPCR are listed in Table S3.

221

#### 222 MAPK activation assay

223 MAPK activation assays were performed as described previously (Goto *et al.*, 2020). Six-week-  
224 old Arabidopsis seedling samples were flash-frozen with liquid nitrogen, and proteins were  
225 extracted in protein extraction buffer (50 mM Tris-HCl pH 7.5, 150 mM NaCl, 10 % glycerol, 2  
226 mM EDTA, 5 mM DTT, 1  $\times$  EDTA-free Complete Protease Inhibitor Cocktail [Roche, USA],  
227 0.1 % IGEPAL CA630, 0.5 mM PMSF, 1 mM Na<sub>2</sub>MoO<sub>4</sub>, 1 mM NaF, 0.5 mM Na<sub>3</sub>VO<sub>4</sub>, 20 mM  
228  $\beta$ -glycerophosphate). The extract was centrifuged at 16000  $\times$  g to remove insoluble material, and  
229 supernatant protein concentration was measured using the Bradford method (Bio-Rad  
230 Laboratories, USA). Total proteins were separated by SDS-PAGE and blotted onto a PVDF  
231 membrane as recommended by the manufacturer (Transblot, Bio-Rad Laboratories, USA). The  
232 membrane was blocked overnight at 4  $^{\circ}$ C in a solution of 5 % (w/v) skim milk (Wako, Japan) in  
233 Tris-buffered saline with 0.05 % (v/v) Tween 20 (TBS-T). Phosphorylated MAPKs were detected  
234 using  $\alpha$ -phospho-p44/42 MAPK (Erk1/2) (Thr202/Tyr204) (D13.14.4E) rabbit monoclonal  
235 antibody (1:2000, Cell Signaling Technology, USA) for 1 h at room temperature in a solution of  
236 5 % (w/v) BSA (Sigma-Aldrich, Japan) in TBS-T, followed by incubation with  $\alpha$ -rabbit IgG-  
237 HRP-conjugated secondary antibodies (1:10000, Roche, USA) for 1 h at room temperature in a  
238 solution of 5 % skim milk in TBS-T. HRP-conjugated antibody signal was detected using Super  
239 Signal West Femto Maximum Sensitivity Substrate (Thermo Fisher Scientific, USA) with a LAS  
240 4000 system (GE Healthcare, USA). The PVDF membranes were stained with CBB to verify



241 equal loading.

242

243 Pathogen infection assay

244 Bacterial infection assays were performed using *Pseudomonas syringae* pv. *tomato* (*Pto*) DC3000  
245 *COR* and *P. syringae* pv. *cilantro* (*Pci*) 0788-9 as described previously (Zipfel *et al.*, 2004; Goto  
246 *et al.*, 2020). Bacterial strains were grown overnight in LB medium containing 500 µg/mL  
247 kanamycin and 100 µg/mL rifampicin. Cells were harvested by centrifugation, and pellets were  
248 re-suspended in 10 mM MgCl<sub>2</sub> to 1.0 × 10<sup>6</sup> CFU/ml. Immediately prior to spraying, 0.02 % (v/v)  
249 Silwet L-77 was added to bacterial suspensions, and bacteria were sprayed until saturation onto  
250 leaf surfaces of 5- to 6-week-old plants. Leaf discs were taken three days post-inoculation from  
251 three leaves per plant and six plants per genotype. Leaf discs were ground in 10 mM MgCl<sub>2</sub>,  
252 diluted, and plated on LB agar with appropriate selection. Plates were incubated at 28 °C and  
253 colonies were counted two days later.

254 *C. higginsianum* infection assays were performed as described previously (Hiruma &  
255 Saijo, 2016a,b; Goto *et al.*, 2020). Conidia were harvested from 7- to 10-day-old potato dextrose  
256 agar cultures under 12 h of near-UV blue light and 12 h of darkness at 25 °C. Conidia were washed  
257 three times with distilled water, and counted using a Bright-line Hemocytometer (Hausser  
258 Scientific, USA). Five droplets, each containing 5.0×10<sup>6</sup> conidia/mL, were spotted on leaves of  
259 3-week-old Arabidopsis plants. Infected plants were watered and maintained in a covered tray. At  
260 7- to 10-days post-infection, macroscopic symptoms were assessed by measuring lesions along  
261 their X- and Y-axes using Fiji software (Schindelin *et al.*, 2012).

262

263 *In vitro* pull-down assay

264 Ten micrograms of MBP and GST fusion proteins were incubated in pull-down buffer (20 mM  
265 HEPES-KOH pH 7.5, 50 mM KCl, 5 mM MgCl<sub>2</sub>, 1 % Tween 20, 1 mM DTT, and 100 µM  
266 phenylmethylsulphonyl fluoride) at 4 °C for 1 h. MBP and GST fusion proteins were separated  
267 from supernatants using amylose resin (New England Biolabs) and Glutathione Sepharose 4 Fast  
268 Flow (GE Healthcare Life Sciences), respectively. Amylose resin and Glutathione Sepharose were  
269 washed four times with pull-down buffer and eluted with 10 mM maltose and 10 mM reduced  
270 glutathione, respectively. Bound proteins were visualized by SDS-PAGE/CBB staining.

271

272 Confocal microscopy

273 Four-week-old *N. benthamiana* leaves were used to observe subcellular localization of PB1CP-  
274 GFP and mScarlet-RBOHD. The fluorescence signals of GFP and mScarlet were recorded using  
275 confocal laser scanning microscopy (Leica TCS SP5, Leica Microsystems GmbH, Germany)  
276 after excitation at 488 nm or 561 nm, respectively with an argon laser. Fluorescence emission

277 was collected between 500 - 540 nm for GFP and 559 - 595 nm for mScarlet. Stacking images  
278 of 30 consecutive 1µm planes were displayed as a maximum projection. The micrographs were  
279 processed using LAS X version; 3.3.0.16799 and Fiji software (Schindelin *et al.*, 2012).

280 **Results**

281 **PB1CP is a novel interactor of NADPH Oxidase RBOHD during PTI**

282 To understand the regulatory mechanism of PAMP-induced ROS production during PTI, we  
283 employed co-immunoprecipitation coupled with liquid chromatography-tandem mass  
284 spectrometry (LC-MS/MS) to identify novel regulators of RBOHD in Arabidopsis. We used a  
285 stable transgenic Arabidopsis line expressing 3×FLAG-tagged RBOHD under the control of its  
286 own promoter in a *rbohD* knockout background (*rbohD/pRBOHD::3×FLAG-gRBOHD*) (Kadota  
287 *et al.*, 2014). Plants were treated with elf18 or with elf18 and flg22 simultaneously (elf18+flg22)  
288 to activate RBOHD. FLAG-RBOHD was immunoprecipitated using α-FLAG antibody and eluted  
289 by competition with FLAG peptide, and RBOHD-associated proteins were identified by LC-  
290 MS/MS (Fig. S1a; Table S1). In three independent experiments, we identified 450 candidate  
291 RBOHD-associated proteins. Among those candidates there were proteins known to associate  
292 with RBOHD, such as cysteine-rich RK 2 (CRK2) (Kimura *et al.*, 2020), and extra-large guanine  
293 nucleotide-binding protein 3 (XLG3) (Liang *et al.*, 2016). There were also known PRR interactors  
294 such as BAK1(Chinchilla *et al.*, 2007; Heese *et al.*, 2007), CERK1 (Miya *et al.*, 2007), FER  
295 (Stegmann *et al.*, 2017), IOS1(Yeh *et al.*, 2016), the cyclic nucleotide-gated ion channels CNGC2  
296 and CNGC4 (Tian *et al.*, 2019), as well as the plasma membrane calcium ATPases ACA8 and  
297 ACA10 (Frei dit Frey *et al.*, 2012) (Table S1). These proteins were not unexpected as we had  
298 previously shown that RBOHD associates with EFR and FLS2 even before PAMP recognition  
299 (Kadota *et al.*, 2014). Consistent with the observation that BAK1 interacts with EFR and FLS2 in  
300 a ligand-dependent manner (Chinchilla *et al.*, 2007; Heese *et al.*, 2007; Schulze *et al.*, 2010; Roux  
301 *et al.*, 2011; Sun *et al.*, 2013), BAK1 was present in higher amounts after PAMP treatment (Fig.  
302 S1b; Table S1). These results show that the methods employed are effective for isolating active  
303 PRR-RBOHD complex(es) containing BAK1. We also identified proteins that are known to  
304 accumulate in the detergent-resistant plasma membrane fraction (DRM) after treatment with flg22,  
305 such as remorin and STOMATIN/PROHIBITIN/FLOTILLIN/HFLK/C (SPFH) domain  
306 containing proteins (Table S1)(Keinath *et al.*, 2010). This result supports the observation in rice  
307 that RBOHs accumulate in the DRM after PAMP treatment (Nagano *et al.*, 2016).

308 To identify proteins that play a role in the regulation of RBOHD, we selected 30  
309 RBOHD-associated candidates based on their functions for transient expression assays to see  
310 what effect they would have on PAMP-induced ROS production. The candidate genes were  
311 expressed under the control of the CaMV 35S promoter in *N. benthamiana* and ROS production  
312 was measured after induction with flg22 (Fig. S2; Table S2). The effect of each candidate protein  
313 on flg22-induced ROS production was evaluated by comparing the regions where candidate  
314 proteins or GUS protein acting as a negative control were expressed in the same leaves under the  
315 control of the CaMV 35S promoter when introduced by Agroinfiltration. As positive control, we

316 expressed BIK1. As expected, BIK1 expression resulted in a significant increase in flg22-induced  
317 ROS production (Fig. S2). Among 30 candidates, six genes significantly suppressed flg22-  
318 induced ROS production, and none increased it (Table S2). The six candidate negative regulators  
319 are KARYOPHERIN ENABLING THE TRANSPORT OF THE CYTOPLASMIC HYL1  
320 (AT5G19820) (Zhang *et al.*, 2017; Xiong *et al.*, 2020), 2-oxoglutarate dehydrogenase E1  
321 component (AT3G55410), lipase/lipoxygenase plat domain protein 2 (AT2G22170), an LRR-RK  
322 (AT3G02880), N-TERMINAL-TRANSMEMBRANE C2 DOMAIN PROTEINS TYPE 4/Ca<sup>2+</sup>-  
323 DEPENDENT LIPID-BINDING PROTEIN 1/SYNAPTOTAGMIN 7 (AT3G61050) (de Silva *et al.*, 2011; Ishikawa *et al.*, 2020; Lee *et al.*, 2020b), and PB1CP (AT2G01190). PB1CP is the focus  
324 of the present study because a PB1 domain is conserved in p40phox and p67phox, which are  
325 important regulators of NOX2 in animals. The PB1 domain functions as a protein-binding module  
326 through PB1-mediated heterodimerization or homo-oligomerization. For example, the p40<sup>phox</sup> and  
327 p67<sup>phox</sup> proteins interact with each other through their PB1 domains, which facilitate the assembly  
328 of NOX2 and the cytosolic regulators p22<sup>phox</sup>, p40<sup>phox</sup>, and Rac at the membrane. Such assembly  
329 results in NOX2-mediated production of O<sub>2</sub><sup>-</sup> (Canton & Grinstein, 2014). Co-  
330 immunoprecipitation with FLAG-RBOHD indicated a total of three unique peptides  
331 corresponding to PB1CP from untreated, elf18, and elf18+flg22-treated samples (Fig. S1; Table  
332 1). The expression of *PB1CP* under the control of the CaMV 35S or native promoters significantly  
333 reduced flg22-induced ROS production in *N. benthamiana* (Fig. 1, S3). These results suggest that  
334 PB1CP negatively regulates flg22-induced ROS production.  
335

336

### 337 **PB1CP negatively regulates PAMPs-induced ROS production in Arabidopsis**

338 To clarify the role of PB1CP during PTI, we characterized two independent *pblcp* mutants,  
339 *pblcp-1* (SALK\_036544) and *pblcp-2* (SALK\_207053). The *pblcp-2* allele has a T-DNA  
340 insertion at the second exon, resulting in a potentially null mutant (Fig. S4a). In contrast, the  
341 *pblcp-1* allele is unlikely null as it has T-DNA insertion within the 5' UTR that results in a  
342 significant reduction in *PB1CP* transcript levels (Fig. S4b). These *pblcp* mutants did not show  
343 any obvious phenotypic abnormalities (Fig. S4c). Importantly, the *pblcp* mutants produced  
344 significantly higher ROS production upon induction with flg22, elf18, or chitin, than in Col-0  
345 (Fig. 2a–c). The *pblcp* mutants did not show any difference in flg22-induced MAPK activation  
346 (Fig. 2d), which is a ROS-independent signaling event during PTI (Shinya *et al.*, 2014),  
347 suggesting that PB1CP is specifically involved in ROS production.

348 To further investigate the role of PB1CP during PTI, we generated two independent  
349 Arabidopsis transgenic lines overexpressing PB1CP-3×HA under the control of the CaMV 35S  
350 promoter (*p35S::PB1CP-3×HA*) (Fig. S5). Similar to the *pblcp* mutants, neither *p35S::PB1CP-*  
351 *3×HA* line differed phenotypically from wild-type (Fig. S5b). Opposite to the *pblcp* mutants,

352 *p35S::PB1CP-3×HA* lines induced less ROS production upon treatment with flg22, elf18, or  
353 chitin, compared to wild-type Col-0 (Fig. 3a-c), and flg22-induced MAPKs activation was  
354 unchanged in the transgenic lines (Fig. 3d). Based on these results, we concluded that PB1CP  
355 specifically negatively regulates RBOHD-mediated ROS production in Arabidopsis.

356

### 357 **PB1CP reduces resistance against *C. higginsianum***

358 To test if there is a link between PB1CP-mediated regulation of ROS production and disease  
359 resistance, we measured resistance against the weakly virulent bacterial strain *Pseudomonas*  
360 *syringae* pv. *tomato* (*Pto*) DC3000 *COR* that lacks the toxin coronatine (COR) which otherwise  
361 triggers stomatal reopening during infection (Melotto *et al.*, 2006), and the non-adapted bacterium  
362 *Pseudomonas syringae* pv. *cilantro* (*Pci*) 0788-9, which grows very poorly on Arabidopsis Col-0  
363 plants (Lewis *et al.*, 2008). Six-week-old Arabidopsis plants were spray-inoculated with *Pto*  
364 DC3000 *COR* and *Pci* 0788-9. There was no difference in bacterial growth of *Pto* DC3000 *COR*  
365 and *Pci* 0788-9 in the *pb1cp* mutants or *p35S::PB1CP-3×HA* lines, compared to Col-0 (Fig.  
366 S6a,b), suggesting that PB1CP is not required for resistance against these bacteria. Next, we  
367 quantified resistance against the fungal pathogen *C. higginsianum*. Six-week-old Arabidopsis  
368 leaves were drop-inoculated with *C. higginsianum*, and lesion diameters were measured (Fig. 4).  
369 Lesion diameters were smaller in the *pb1cp* mutants and larger in *p35S::PB1CP-3×HA* lines than  
370 in wild type, suggesting that *PB1CP* negatively regulates resistance against fungal infection, at  
371 least for a relatively host-specific pathogen like *C. higginsianum*.

372

### 373 **PB1CP directly interacts with RBOHD-ND, and PAMP treatment enhance the interaction**

374 To confirm PB1CP-RBOHD interaction, we immunoprecipitated PB1CP-3×HA with  $\alpha$ -HA  
375 antibody from the *PB1CP-3×HA* (*p35S::PB1CP-3×HA*) Arabidopsis line. PB1CP associated  
376 weakly with endogenous RBOHD (Fig. 5a). Consistent with the original observation that PB1CP-  
377 derived peptides are present in greater amounts in PAMP-treated samples, treatment with elf18 or  
378 flg22 for 10 min increased PB1CP-RBOHD association. There was a similar but weaker effect of  
379 elf18, perhaps due to reduced EFR expression and elf18 recognition in Arabidopsis roots (Wu *et*  
380 *al.*, 2016). In contrast, BIK1 was not detected in the PB1CP complex even after treatment with  
381 elf18 or flg22, suggesting that BIK1 may not be present in the PB1CP-RBOHD complex.

382 An *in vitro* binding assay using recombinant proteins was used to test if PB1CP and  
383 RBOHD bind directly (Fig. 5b). Although we were unable to obtain full-length PB1CP  
384 recombinant protein, we were able to express domains of PB1CP (ND, PB1 domain (PB1D), and  
385 CD) in *E. coli*. *In vitro* pull-down assays showed that PB1CP-CD, but not PB1CP-ND nor PB1D,  
386 bind directly with RBOHD-ND. Furthermore, PB1CP-CD competed with BIK1 for RBOHD-ND  
387 binding (Fig. 5c), suggesting that PB1CP-CD and BIK1 share an overlapping binding region of

388 RBOHD-ND. The competition of PB1CP with BIK1 for binding with RBOHD is consistent with  
389 the finding that BIK1 was not part of the PB1CP-RBOHD complex *in vivo* (Fig. 5a).

390

### 391 **PAMP treatment induces PB1CP accumulation in endomembrane compartments**

392 To understand further how PB1CP regulates RBOHD, we monitored its subcellular localization  
393 by transiently expressing *PB1CP-GFP* in leaves of *N. benthamiana* by Agroinfiltration under the  
394 control of its own promoter (*pPB1CP::PB1CP-GFP*). Confocal microscopy showed that PB1CP-  
395 GFP signal was distributed in the cell periphery and cytoplasm (Fig. 6). We also observed that  
396 small PB1CP-GFP signal foci moved around the cell periphery and within the cytoplasm (Video  
397 S1). Interestingly, treatment with flg22 or chitin for 3-6 h reduced PB1CP-GFP signals in the cell  
398 periphery and cytoplasm, and many PB1CP-GFP signal foci appeared in those regions (Fig. 6b;  
399 Video S2). The PB1CP-GFP foci that appeared after treatment with flg22 clearly co-localized  
400 with FM4-64 dye, an endocytic tracer, showing that the foci localized at endomembrane  
401 compartments (Fig. 6c). These results suggest that PB1CP moves from the cytoplasm and cell  
402 periphery to endomembrane compartments in response to PAMPs.

403

### 404 **PB1CP reduces plasma membrane localization of RBOHD**

405 We also determined RBOHD protein levels in *pb1cp* mutants and *p35S::PB1CP-3×HA* lines.  
406 Immunoblotting showed that the amounts of RBOHD were similar in all lines, suggesting that  
407 PB1CP does not affect RBOHD stability *in vivo* (Fig. S8a). RT-qPCR analysis also showed that  
408 transcript levels of *RBOHD* were similar (Fig. S8b). Since PB1CP-GFP accumulates within small  
409 endomembrane compartments (Fig. 6a,b), we hypothesized that PB1CP regulates the endocytosis  
410 of RBOHD to control RBOHD protein levels at the plasma membrane. To test this hypothesis,  
411 we fused the mScarlet-tag-coding sequence to the 5' end of the coding region of the genomic  
412 DNA of *RBOHD* (*gRBOHD*) and expressed mScarlet-RBOHD under the control of CaMV 35S  
413 promoter in *N. benthamiana*. This experiment confirmed that mScarlet-RBOHD is localized at  
414 the plasma membrane and is functional there (Fig. S9a-c). Importantly, we did not detect any  
415 truncation of mScarlet-RBOHD protein, confirming that the fluorescent signal is from full-length  
416 mScarlet-RBOHD (Fig. S9d). In a previous report, RBOHD expressed in tobacco cell cultures  
417 was localized at the plasma membrane as well as in intracellular compartments, mainly within  
418 Golgi cisternae (Noirot *et al.*, 2014). There was no intracellular localization of mScarlet-RBOHD  
419 when expressed alone or co-expressed with free GFP in *N. benthamiana* (Fig. 7a, S9e). However,  
420 co-expression with PB1CP-GFP reduced plasma membrane localization of mScarlet-RBOHD and  
421 increased its cytoplasmic localization (Fig. 7a,b, S9e), suggesting a role for PB1CP in RBOHD  
422 relocation from the plasma membrane to the cytoplasm.

423

Since PB1CP interaction with RBOHD is stronger after PAMP treatment, such treatment

424 should further reduce the plasma membrane localization of RBOHD. However, there was no  
425 detectable relocalization of RBOHD upon flg22 treatment (Fig. **7a,b**). This may be due to newly  
426 synthesized RBOHD masking the effect of PB1CP. Thus, CHX was used to inhibit *de novo*  
427 synthesis of RBOHD. CHX treatment reduced the overall intensity of mScarlet-RBOHD, but  
428 mScarlet-RBOHD still clearly localized at the plasma membrane (Fig. **7c**). The expression of  
429 *PB1CP* reduced plasma membrane localization of RBOHD even in the presence of CHX.  
430 Importantly, flg22 treatment reduced plasma membrane localization in the presence of CHX (Fig.  
431 **7c,d**). Moreover, treatment with flg22 together with the expression of PB1CP-GFP further  
432 reduced plasma membrane localization of mScarlet-RBOHD in the presence of CHX (Fig. **7c,d**).  
433 These results suggest that PB1CP relocalizes plasma membrane-localized RBOHD upon PAMP  
434 treatment. It is also notable that mScarlet-RBOHD foci appeared in the cytoplasm of cells  
435 expressing PB1CP-GFP after treatment with CHX and flg22, and that some cytoplasmic foci co-  
436 localized with PB1CP-GFP (Fig. **7e**), indicating that there is a functional link between RBOHD  
437 and PB1CP *in vivo*.



438 **Discussion**

439 **PB1CP negatively regulates RBOHD by direct binding**

440 ROS produced by RBOHs serve as signaling molecules not only in plant immunity but also in a  
441 variety of biological processes such as abiotic stress responses, growth, and development (Suzuki  
442 *et al.*, 2011). Plants tightly regulate the activity of RBOHs to minimize the detrimental effects of  
443 ROS, but the precise regulatory mechanisms of RBOH are unknown. In this work, we identified  
444 PB1CP as a previously unknown competitive binding protein for RBOHD. Phenotypic  
445 characterization of both *pblcp* mutants and overexpressors showed that PB1CP negatively  
446 regulates RBOHD upon PAMP perception (Fig. 2a–c, 3a–c).

447 Because PB1CP negatively regulates RBOHD during PTI, we expected that loss- or  
448 gain-of-function lines of PB1CP would affect immunity against pathogens, but this was only true  
449 for the fungal pathogen *C. higginsianum* but not against the bacterial pathogens *Pto* DC3000  
450 *COR* and *Pci* 0788-9 (Fig. 4, S6a,b). This may be because the amount of ROS required for  
451 defense against bacterial pathogens may be different than for fungal pathogens. For example, one  
452 of the primary defense mechanisms against these bacterial pathogens is based on stomatal closure  
453 (Melotto *et al.*, 2008), which may not be affected when ROS levels are altered by PB1CP. In  
454 contrast, *C. higginsianum* has to pass through the plant cell wall and invaginate into the cell by  
455 modulating host plasma membrane during infection (O’Connell *et al.*, 2012). It is possible that  
456 the fungus may be more sensitive to ROS because of its close association with the plasma  
457 membrane during this process. Alternatively, there may be some additional unknown fungal  
458 immunity mechanism controlled by ROS that is affected by PB1CP.

459

460 **PB1CP is in one of the eight groups of PB1 domain-containing proteins**

461 Most of the PB1 domain ranges from 80 to 100 amino acids in length and exhibits a ubiquitin-  
462 like  $\beta$ -grasp fold with five  $\beta$ -sheets and two  $\alpha$ -helices (Müller *et al.*, 2006; Korasick *et al.*, 2014).  
463 In animals, the PB1 domain functions as a protein-binding module for heterodimerization or  
464 homo-oligomerization. In particular, the PB1 domains of p40<sup>phox</sup> and p67<sup>phox</sup> interact with each  
465 other, which facilitates the assembly of other cytosolic regulators to NOX2 at the membrane  
466 (Groemping & Rittinger, 2005; Sumimoto, 2008). Arabidopsis encodes more than 80 PB1  
467 domain-containing proteins, which can be segregated into eight families based on domain  
468 architecture (Mutte & Weijers, 2020). PB1CP belongs to the ‘kinase-derived family’, which is  
469 characterized by one PB1 domain in the ND with a large flanking sequence without any known  
470 domains. The PB1 domains of members in the ‘kinase-derived family’ resemble the PB1 domains  
471 of the ‘kinase domain family’. Kinase-derived PB1 domains appear to have been duplicated in  
472 the ancestors of angiosperms (Mutte & Weijers, 2020). The role of the PB1 domain in PB1CP still  
473 needs to be clarified, given that it is unlikely to be involved in interactions between RBOHD and

474 PB1CP (Fig. **5b**). By analogy to p40<sup>phox</sup> and p67<sup>phox</sup>, the PB1 domain of PB1CP may induce  
475 heterodimerization with an unidentified regulator of RBOHD. For instance, it is possible that the  
476 PB1 domain of PB1CP interacts with members of the ‘kinase-derived family’ or the ‘kinase  
477 domain family’. As evidence for this possibility, a yeast two-hybrid analysis showed that PB1CP  
478 binds to AT3G48240, another member of ‘kinase-derived PB1 family’, but the role of AT3G48240  
479 in RBOHD regulation, if any, remains to be demonstrated (Arabidopsis Interactome Mapping  
480 Consortium 2011). Another possible role of the PB1 domain is to induce homo-oligomerization  
481 of PB1CP, which may result in the recruitment of RBOHD to the hypothetical PB1CP homo-  
482 oligomer.

483           Some PB1 domains can also undergo non-canonical interactions with proteins that do  
484 not have PB1 domains. For example, PAL OF QUIRKY (POQ), a PB1 domain-containing protein  
485 which belongs to the same group as PB1CP, interacts with STRUBBELIG (SUB), a cell surface  
486 LRR-RK, and QUIRKY (QKY), a protein containing multiple C2 domains and transmembrane  
487 regions (Trehin *et al.*, 2013). Interestingly, POQ localizes at the cell periphery and in small  
488 cytoplasmic compartments, which is similar to PB1CP (Trehin *et al.*, 2013). In addition, SUB is  
489 ubiquitinated *in vivo* and undergoes clathrin-mediated endocytosis (Gao *et al.*, 2019). It is not  
490 known whether POQ is involved in the endocytosis of SUB, but it would be useful to compare  
491 the functions of PB1CP, POQ, and other PB1 domain-containing proteins in the same group  
492 during endocytosis.

493

#### 494 **A model for the PB1CP regulatory mechanism of RBOHD**

495 Although PB1CP associates with RBOHD, the interaction is more evident upon PAMP treatment  
496 (Fig. **5a, b**), suggesting that PB1CP binding is stronger with an activated form of RBOHD. Based  
497 on this result, we propose a model for PB1CP-mediated regulation of RBOHD in which PAMPs  
498 recognition triggers RLCK proteins such as BIK1 and CPKs to phosphorylate RBOHD-ND (Fig.  
499 S10) (Dubiella *et al.*, 2013; Kadota *et al.*, 2014; Li *et al.*, 2014). At the same time, the EF-hand  
500 motifs at RBOHD-ND bind to Ca<sup>2+</sup>, whose entry into the cell is mediated by plasma membrane  
501 Ca<sup>2+</sup> channels activated by BIK1 (Ogasawara *et al.*, 2008; Oda *et al.*, 2010). It is possible that  
502 PB1CP recognizes a phosphorylated form of RBOHD-ND or its structural changes caused by  
503 Ca<sup>2+</sup> interaction. Alternatively, PB1CP may specifically bind to the homodimer of RBOHD at the  
504 plasma membrane once induced by PAMP treatment. In either case, once PB1CP interacts with  
505 RBOHD, BIK1-RBOHD binding is likely disrupted by both competition (Fig. **5c**) and the absence  
506 of BIK1 from the PB1CP-RBOHD complex (Fig. **5a**). Therefore, a possible function of PB1CP  
507 in the regulation of RBOHD is to release BIK1 from RBOHD, especially after activation by  
508 PAMPs. However, further examination of the activated RBOHD complex is required before this  
509 model can be confidently adopted.

510           Once PB1CP binds to RBOHD, it may induce relocation of the complex from the plasma  
511 membrane to the cytoplasm. This is suggested by the marked decrease in RBOHD levels at the  
512 plasma membrane and the increase at the cytoplasm following transient expression of PB1CP  
513 (Fig. 7a,b). It is noteworthy that Agroinfiltration itself inevitably activates PTI via  
514 Agrobacterium-derived PAMPs. Thus it is possible that, at least in *N. benthamiana*, PB1CP binds  
515 tightly to RBOHD that is activated by PAMPs and relocates the protein. However, we cannot  
516 exclude the possibility that PB1CP controls plasma membrane RBOHD localization even in the  
517 absence of PAMPs when it is overexpressed.

518           The plasma membrane relocalization of RBOHD upon PAMP treatment was only  
519 detectable in the presence of CHX (Fig. 7c,d) because mScarlet-RBOHD is highly expressed, and  
520 the supply of newly synthesized RBOHD to the plasma membrane would make it difficult to  
521 observe RBOHD dynamics. We tried to express mScarlet-RBOHD under the control of native  
522 promoter in *N. benthamiana*, but failed to detect fluorescence, probably because of low expression.  
523 In the presence of CHX, we detected RBOHD signal foci co-localized with PB1CP after PAMP  
524 treatment (Fig. 7e), suggesting that RBOHD moves from the plasma membrane to the cytoplasm  
525 in concert with PB1CP. Clathrin- and microdomain-dependent endocytic pathways were shown  
526 to cooperatively regulate RBOHD dynamics (Hao *et al.*, 2014). Thus, one attractive hypothesis is  
527 that PB1CP-mediated relocalization of RBOHD is through endocytosis, and the small mScarlet-  
528 RBOHD and PB1CP-GFP signal foci may be endosomes. We also detected the clathrin-related  
529 components HAP13 and AP4M, and flg22-inducible DRM components such as remorin and  
530 SPFH proteins by co-immunoprecipitation with RBOHD (Table S1). In addition, the E3 ubiquitin  
531 ligase PIRE, which interacts with both PBL13 and RBOHD, ubiquitinates RBOHD and decreases  
532 its abundance, possibly through endocytosis of RBOHD and vacuolar degradation (Lin *et al.*,  
533 2015; Lee *et al.*, 2020a). Thus it is worth investigating the molecular relationship between PB1CP  
534 and PIRE for the endocytosis of RBOHD. It would also be interesting to test whether PB1CP-  
535 based regulation extends to other plant RBOHs, which have diverse functions in stress adaptation,  
536 growth, and development.

537           We have focused on the role of PB1CP in this work, but other candidate RBOHD-  
538 associated proteins are also of interest and will be explored elsewhere.

539

#### 540 **Acknowledgments**

541 We thank all members of the Shirasu lab for their discussion of and insights about the work. We  
542 thank Ms. Akiko Ueno, Ms. Naomi Watanabe, Ms. Mamiko Kouzai, Ms. Yoko Nagai, and Ms.  
543 Kanako Hori for their support of this project. We thank Dr. Max Fishman for critical reading of  
544 the manuscript. The research was financially supported by JSPS KAKENHI Grant Numbers  
545 16J00771 (to Y.G.), 16H06186, 16KT0037, 20H02994 (to Y.K), 15H05959, 17H06172 (to K.S),

546 as well as the Gatsby Charitable Foundation (F.L.H.M and C.Z.) and the European Research  
547 Council (project ‘PHOSPHinnATE’, grant agreement No. 309858).

548

#### 549 **Author contributions**

550 Y.G, Y.K, C.Z, and K.S. supervised the research. Y.K. performed co-immunoprecipitation of  
551 RBOHD. J.S, P.D, and F.L.H.M. performed LC-MS/MS analyses, N.M. helped generate  
552 constructs of RBOHD-associated proteins for transient expression in *N. benthamiana*, and Y.G.  
553 performed the other experiments. Y.G, Y.K, and K.S. wrote the manuscript. All of the authors,  
554 read, commented on, and approved the manuscript.

555

#### 556 **References**

557 **Arabidopsis Interactome Mapping Consortium. 2011.** Evidence for network evolution in an  
558 Arabidopsis interactome map. *Science* **333**, 601-607.

559 **Azevedo C, Santos-Rosa MJ, Shirasu K. 2001.** The U-box protein family in plants. *Trends in*  
560 *plant science*, **6**, 354–358.

561 **Bedard K, Krause KH. 2007.** The NOX family of ROS-generating NADPH oxidases:  
562 physiology and pathophysiology. *Physiol Rev* **87**, 245-313.

563 **Canton J, Grinstein S. 2014.** Priming and activation of NADPH oxidases in plants and animals.  
564 *Trends Immunol* **35**, 405-407.

565 **Chinchilla D, Zipfel C, Robatzek S, Kemmerling B, Nurnberger T, Jones JD, Felix G, Boller**  
566 **T. 2007.** A flagellin-induced complex of the receptor FLS2 and BAK1 initiates plant  
567 defence. *Nature* **448**, 497-500.

568 **Clough SJ, Bent AF. 1998.** Floral dip: a simplified method for Agrobacterium-mediated  
569 transformation of *Arabidopsis thaliana*. *Plant J* **16**, 735-743.

570 **de Silva K, Laska B, Brown C, Sederoff HW, Khodakovskaya M. 2011.** *Arabidopsis thaliana*  
571 calcium-dependent lipid-binding protein (AtCLB): a novel repressor of abiotic stress  
572 response. *J Exp Bot* **62**, 2679-2689.

573 **Dubiella U, Seybold H, Durian G, Komander E, Lassig R, Witte CP, Schulze WX, Romeis**  
574 **T. 2013.** Calcium-dependent protein kinase/NADPH oxidase activation circuit is required  
575 for rapid defense signal propagation. *Proc Natl Acad Sci USA* **110**, 8744-8749.

576 **Frei Dit Frey N, Mbengue M, Kwaaitaal M, Nitsch L, Altenbach D, Haweker H, Lozano-**  
577 **Duran R, Njo MF, Beeckman T, Huettel B et al. 2012.** Plasma membrane calcium  
578 ATPases are important components of receptor-mediated signaling in plant immune  
579 responses and development. *Plant Physiol* **159**, 798-809.

580 **Gao J, Chaudhary A, Vaddepalli P, Nagel MK, Isono E, Schneitz K. 2019.** The *Arabidopsis*  
581 receptor kinase STRUBBELIG undergoes clathrin-dependent endocytosis. *J Exp Bot* **70**,

- 582 3881-3894.
- 583 **Goto Y, Maki N, Ichihashi Y, Kitazawa D, Igarashi D, Kadota Y, Shirasu K. 2020.** Exogenous  
584 treatment with glutamate induces immune responses in *Arabidopsis*. *Mol Plant Microbe*  
585 *Interact* **33**, 474-487.
- 586 **Groemping Y, Rittinger K. 2005.** Activation and assembly of the NADPH oxidase: a structural  
587 perspective. *Biochem. J* **386**, 401-416.
- 588 **Hao H, Fan L, Chen T, Li R, Li X, He Q, Botella MA, Lin J. 2014.** Clathrin and membrane  
589 microdomains cooperatively regulate RbohD dynamics and activity in *Arabidopsis*. *Plant*  
590 *Cell* **26**, 1729-1745.
- 591 **Heese A, Hann DR, Gimenez-Ibanez S, Jones AME, He K, Li J, Schroeder JI, Peck SC,**  
592 **Rathjen JP. 2007.** The receptor-like kinase SERK3/BAK1 is a central regulator of innate  
593 immunity in plants. *Proc. Natl. Acad. Sci. USA*, **104**, 12217-12222.
- 594 **Hiruma K, Saijo Y. 2016a.** Methods for long-term stable storage of *Colletotrichum* species.  
595 *Methods Mol Biol* **1398**, 309-312.
- 596 **Hiruma K, Saijo Y. 2016b.** Plant inoculation with the fungal leaf pathogen *Colletotrichum*  
597 *higginsianum*. *Methods Mol Biol* **1398**, 313-318.
- 598 **Ishikawa K, Tamura K, Fukao Y, Shimada T. 2020.** Structural and functional relationships  
599 between plasmodesmata and plant endoplasmic reticulum-plasma membrane contact sites  
600 consisting of three synaptotagmins. *New Phytol* **226**, 798-808.
- 601 **Kadota Y, Liebrand TWH, Goto Y, Sklenar J, Derbyshire P, Menke FLH, Torres MA,**  
602 **Molina A, Zipfel C, Coaker G et al. 2019.** Quantitative phosphoproteomic analysis  
603 reveals common regulatory mechanisms between effector- and PAMP-triggered  
604 immunity in plants. *New Phytol* **221**, 2160-2175.
- 605 **Kadota Y, Macho AP, Zipfel C. 2016.** Immunoprecipitation of plasma membrane receptor-like  
606 kinases for identification of phosphorylation sites and associated proteins. *Methods Mol.*  
607 *Biol.* **1363**, 133-144.
- 608 **Kadota Y, Shirasu K, Zipfel C. 2015.** Regulation of the NADPH oxidase RBOHD during plant  
609 immunity. *Plant Cell Physiol.* **56**, 1472-80.
- 610 **Kadota Y, Sklenar J, Derbyshire P, Stransfeld L, Asai S, Ntoukakis V, Jones JD, Shirasu K,**  
611 **Menke F, Jones A et al. 2014.** Direct regulation of the NADPH oxidase RBOHD by the  
612 PRR-associated kinase BIK1 during plant immunity. *Mol Cell* **54**, 43-55.
- 613 **Keinath NF, Kierszniowska S, Lorek J, Bourdais G, Kessler SA, Shimosato-Asano H,**  
614 **Grossniklaus U, Schulze WX, Robatzek S, Panstruga R. 2010.** PAMP (pathogen-  
615 associated molecular pattern)-induced changes in plasma membrane  
616 compartmentalization reveal novel components of plant immunity. *J Biol Chem* **285**,  
617 39140-39149.



- 618 **Kimura S, Hunter K, Vaahtera L, Tran HC, Citterico M, Vaattovaara A, Rokka A, Stolze**  
619 **SC, Harzen A, Meissner L et al. 2020.** CRK2 and C-terminal phosphorylation of  
620 NADPH oxidase RBOHD regulate reactive oxygen species production in Arabidopsis.  
621 *Plant Cell* **32**, 1063-1080.
- 622 **Korasick DA, Westfall CS, Lee SG, Nanao MH, Dumas R, Hagen G, Guilfoyle TJ, Jez JM,**  
623 **Strader LC. 2014.** Molecular basis for AUXIN RESPONSE FACTOR protein  
624 interaction and the control of auxin response repression. *Proc Natl Acad Sci US A* **111**,  
625 5427-5432.
- 626 **Lambeth JD, Cheng G, Arnold RS, Edens WA. 2000.** Novel homologs of gp91phox. *Trends in*  
627 *Biochem Sci* **25**, 459-461.
- 628 **Lee D, Lal NK, Lin ZD, Ma S, Liu J, Castro B, Toruno T, Dinesh-Kumar SP, Coaker G.**  
629 **2020a.** Regulation of reactive oxygen species during plant immunity through  
630 phosphorylation and ubiquitination of RBOHD. *Nat Commun* **11**, 1838.
- 631 **Lee E, Santana BVN, Samuels E, Benitez-Fuente F, Corsi E, Botella MA, Perez-Sancho J,**  
632 **Vanneste S, Friml J, Macho A et al. 2020b.** Rare earth elements induce cytoskeleton-  
633 dependent and PI4P-associated rearrangement of SYT1/SYT5 endoplasmic reticulum-  
634 plasma membrane contact site complexes in Arabidopsis. *J Exp Bot* **71**, 3986-3998.
- 635 **Lewis JD, Abada W, Ma W, Guttman DS, Desveaux D. 2008.** The HopZ family of  
636 *Pseudomonas syringae* type III effectors require myristoylation for virulence and  
637 avirulence functions in Arabidopsis thaliana. *J Bacteriol* **190**, 2880-2891.
- 638 **Li L, Li M, Yu L, Zhou Z, Liang X, Liu Z, Cai G, Gao L, Zhang X, Wang Y et al. 2014.** The  
639 FLS2-associated kinase BIK1 directly phosphorylates the NADPH oxidase RbohD to  
640 control plant immunity. *Cell Host Microbe* **15**, 329-338.
- 641 **Liang X, Ding P, Lian K, Wang J, Ma M, Li L, Li L, Li M, Zhang X, Chen S et al. 2016.**  
642 Arabidopsis heterotrimeric G proteins regulate immunity by directly coupling to the  
643 FLS2 receptor. *Elife* **5**, e13568.
- 644 **Lin ZJ, Liebrand TW, Yadeta KA, Coaker G. 2015.** PBL13 is a serine/threonine protein kinase  
645 that negatively regulates Arabidopsis immune responses. *Plant Physiol* **169**, 2950-2962.
- 646 **Lorrain S. 2003.** Lesion mimic mutants: keys for deciphering cell death and defense pathways  
647 in plants? *Trends in Plant Science* **8**, 263-271.
- 648 **Marino D, Dunand C, Puppo A, Pauly N. 2012.** A burst of plant NADPH oxidases. *Trends Plant*  
649 *Sci* **17**, 9-15.
- 650 **Müller S, Kursula I, Zou P, Wilmanns M. 2006.** Crystal structure of the PB1 domain of NBR1.  
651 *FEBS Lett* **580**, 341-344.
- 652 **Martinez-Trujillo M, Limones-Briones V, Cabrera-Ponce J, Herrera-Estrella L. 2004.**  
653 Improving transformation efficiency of Arabidopsis thaliana by modifying the floral dip

- 654 method. *Plant Mol. Biol. Rep* **22**, 63-70.
- 655 **Mbengue M, Bourdais G, Gervasi F, Beck M, Zhou J, Spallek T, Bartels S, Boller T, Ueda**  
656 **T, Kuhn H et al. 2016.** Clathrin-dependent endocytosis is required for immunity  
657 mediated by pattern recognition receptor kinases. *Proc Natl Acad Sci USA* **113**, 11034-  
658 11039.
- 659 **Melotto M, Underwood WA, He SY. 2008.** Role of stomata in plant innate immunity and foliar  
660 bacterial diseases. *Annu Rev Phytopathol* **46**, 101-122.
- 661 **Melotto M, Underwood W, Koczan J, Nomura K, He SY. 2006.** Plant stomata function in  
662 innate immunity against bacterial invasion. *Cell* **126**, 969-980.
- 663 **Mishina TE, Zeier J. 2007.** Pathogen-associated molecular pattern recognition rather than  
664 development of tissue necrosis contributes to bacterial induction of systemic acquired  
665 resistance in Arabidopsis. *Plant J* **50**, 500-513.
- 666 **Mittler R, Blumwald E. 2015.** The roles of ROS and ABA in systemic acquired acclimation.  
667 *Plant Cell* **27**, 64-70.
- 668 **Miya A, Albert P, Shinya T, Desaki Y, Ichimura K, Shirasu K, Narusaka Y, Kawakami N,**  
669 **Kaku H, Shibuya N. 2007.** CERK1, a LysM receptor kinase, is essential for chitin  
670 elicitor signaling in Arabidopsis. *Proc Natl Acad Sci USA* **104**, 19613-19618.
- 671 **Moeder W, Yoshioka K. 2008.** Lesion mimic mutants. *Plant Signal Behav* **3**, 764-767.
- 672 **Mutte SK, Weijers D. 2020.** Deep evolutionary history of the Phox and Bem1 (PB1) domain  
673 across Eukaryotes. *Sci Rep* **10**, 3797.
- 674 **Nagano M, Ishikawa T, Fujiwara M, Fukao Y, Kawano Y, Kawai-Yamada M, Shimamoto**  
675 **K. 2016.** Plasma membrane microdomains are essential for Rac1-RbohB/H-mediated  
676 immunity in rice. *Plant Cell* **28**, 1966-1983.
- 677 **Nekrasov V, Li J, Batoux M, Roux M, Chu ZH, Lacombe S, Rougon A, Bittel P, Kiss-Papp**  
678 **M, Chinchilla D et al. 2009.** Control of the pattern-recognition receptor EFR by an ER  
679 protein complex in plant immunity. *EMBO J* **28**, 3428-3438.
- 680 **Noirot E, Der C, Lherminier J, Robert F, Moricova P, Kieu K, Leborgne-Castel N, Simon-**  
681 **Plas F, Bouhidel K. 2014.** Dynamic changes in the subcellular distribution of the tobacco  
682 ROS-producing enzyme RBOHD in response to the oomycete elicitor cryptogein. *J Exp*  
683 *Bot* **65**, 5011-5022.
- 684 **Ntoukakis V, Mucyn TS, Gimenez-Ibanez S, Chapman HC, Gutierrez JR, Balmuth AL,**  
685 **Jones AME, Rathjen JP. 2009.** Host inhibition of a bacterial virulence effector triggers  
686 immunity to infection. *Science* **324**, 784-787.
- 687 **O'connell RJ, Thon MR, Hacquard S, Amyotte SG, Kleemann J, Torres MF, Damm U,**  
688 **Buiate EA, Epstein L, Alkan N et al. 2012.** Lifestyle transitions in plant pathogenic  
689 *Colletotrichum* fungi deciphered by genome and transcriptome analyses. *Nat Genet* **44**,



- 690 1060-1065.
- 691 **Ogasawara Y, Kaya H, Hiraoka G, Yumoto F, Kimura S, Kadita Y, Hishinuma H, Senzaki**  
692 **E, Yamagoe S, Nagata K et al. 2008.** Synergistic activation of the Arabidopsis NADPH  
693 oxidase AtrbohD by Ca<sup>2+</sup> and phosphorylation. *J Biol Chem.* **283**, 8885-8892.
- 694 **Oda T, Hashimoto H, Kuwabara N, Akashi S, Hayashi K, Kojima C, Wong HL, Kawasaki**  
695 **T, Shimamoto K, Sato M et al. 2010.** Structure of the N-terminal regulatory domain of  
696 a plant NADPH oxidase and its functional implications. *J Biol Chem* **285**, 1435-1445.
- 697 **Robatzek S, Chinchilla D, Boller T. 2006.** Ligand-induced endocytosis of the pattern recognition  
698 receptor FLS2 in Arabidopsis. *Genes Dev* **20**, 537-542.
- 699 **Ross A, Yamada K, Hiruma K, Yamashita-Yamada M, Lu X, Takano Y, Tsuda K, Saijo Y.**  
700 **2014.** The Arabidopsis PEPR pathway couples local and systemic plant immunity. *EMBO*  
701 *J* **33**, 62-75.
- 702 **Roux M, Schwessinger B, Albrecht C, Chinchilla D, Jones A, Holton N, Malinovsky FG, Tor**  
703 **M, De Vries S, Zipfel C. 2011.** The Arabidopsis leucine-rich repeat receptor-like kinases  
704 BAK1/SERK3 and BKK1/SERK4 are required for innate immunity to hemibiotrophic  
705 and biotrophic pathogens. *Plant Cell* **23**, 2440-2455.
- 706 **Schindelin J, Arganda-Carreras I, Frise E, Kaynig V, Longair M, Pietzsch T, Preibisch S,**  
707 **Rueden C, Saalfeld S, Schmid B et al. 2012.** Fiji: an open-source platform for  
708 biological-image analysis. *Nat Methods* **9**, 676-682.
- 709 **Schulze B, Mentzel T, Jehle AK, Mueller K, Beeler S, Boller T, Felix G, Chinchilla D. 2010.**  
710 Rapid heteromerization and phosphorylation of ligand-activated plant transmembrane  
711 receptors and their associated kinase BAK1. *J Biol Chem* **285**, 9444-9451.
- 712 **Segal AW. 2016.** NADPH oxidases as electrochemical generators to produce ion fluxes and turgor  
713 in fungi, plants and humans. *Open Biol* **6**, 160028.
- 714 **Shinya T, Yamaguchi K, Desaki Y, Yamada K, Narisawa T, Kobayashi Y, Maeda K, Suzuki**  
715 **M, Tanimoto T, Takeda J et al. 2014.** Selective regulation of the chitin-induced defense  
716 response by the Arabidopsis receptor-like cytoplasmic kinase PBL27. *Plant J* **79**, 56-66.
- 717 **Stegmann M, Monaghan J, Smakowska-Luzan E, Rovenich H, Lehner A, Holton N,**  
718 **Belkhadir Y, Zipfel C. 2017.** The receptor kinase FER is a RALF-regulated scaffold  
719 controlling plant immune signaling. *Science* **355**, 287-289.
- 720 **Sumimoto H. 2008.** Structure, regulation and evolution of Nox-family NADPH oxidases that  
721 produce reactive oxygen species. *FEBS J* **275**, 3249-3277.
- 722 **Sun Y, Li L, Macho AP, Han Z, Hu Z, Zipfel C, Zhou JM, Chai J. 2013.** Structural basis for  
723 flg22-induced activation of the Arabidopsis FLS2-BAK1 immune complex. *Science* **342**,  
724 624-628.
- 725 **Suzuki N, Miller G, Morales J, Shulaev V, Torres MA, Mittler R. 2011.** Respiratory burst

- 726 oxidases: the engines of ROS signaling. *Curr Opin Plant Biol* **14**, 691-699.
- 727 **Suzuki N, Miller G, Salazar C, Mondal HA, Shulaev E, Cortes DF, Shuman JL, Luo X, Shah**  
728 **J, Schlauch K et al. 2013.** Temporal-spatial interaction between reactive oxygen species  
729 and abscisic acid regulates rapid systemic acclimation in plants. *Plant Cell* **25**, 3553-3569.
- 730 **Thor K, Jiang S, Michard E, George J, Scherzer S, Huang S, Dindas J, Derbyshire P, Leitao**  
731 **N, Defalco TA et al. 2020.** The calcium-permeable channel OSCA1.3 regulates plant  
732 stomatal immunity. *Nature* **585**, 569-573.
- 733 **Tian W, Hou C, Ren Z, Wang C, Zhao F, Dahlbeck D, Hu S, Zhang L, Niu Q, Li L et al. 2019.**  
734 A calmodulin-gated calcium channel links pathogen patterns to plant immunity. *Nature*  
735 **572**, 131-135.
- 736 **Torres MA, Dangl JL. 2005.** Functions of the respiratory burst oxidase in biotic interactions,  
737 abiotic stress and development. *Curr Opin Plant Biol* **8**, 397-403.
- 738 **Trehin C, Schrempp S, Chauvet A, Berne-Dedieu A, Thierry AM, Faure JE, Negrutiu I,**  
739 **Morel P. 2013.** QUIRKY interacts with STRUBBELIG and PAL OF QUIRKY to regulate  
740 cell growth anisotropy during Arabidopsis gynoecium development. *Development* **140**,  
741 4807-4817.
- 742 **Wong HL, Pinontoan R, Hayashi K, Tabata R, Yaeno T, Hasegawa K, Kojima C, Yoshioka**  
743 **H, Iba K, Kawasaki T et al. 2007.** Regulation of rice NADPH oxidase by binding of  
744 Rac GTPase to its N-terminal extension. *Plant Cell* **19**, 4022-4034.
- 745 **Wu Y, Xun Q, Guo Y, Zhang J, Cheng K, Shi T, He K, Hou S, Gou X, Li J. 2016.** Genome-  
746 wide expression pattern analyses of the Arabidopsis leucine-rich repeat receptor-like  
747 kinases. *Mol Plant* **9**, 289-300.
- 748 **Xiong F, Duan CY, Liu HH, Wu JH, Zhang ZH, Li S, Zhang Y. 2020.** Arabidopsis KETCH1  
749 is critical for the nuclear accumulation of ribosomal proteins and gametogenesis. *Plant*  
750 *Cell* **32**, 1270-1284.
- 751 **Yeh YH, Panzeri D, Kadota Y, Huang YC, Huang PY, Tao CN, Roux M, Chien HC, Chin**  
752 **TC, Chu PW et al. 2016.** The Arabidopsis malectin-like/LRR-RLK IOS1 is critical for  
753 BAK1-dependent and BAK1-independent pattern-triggered immunity. *Plant Cell* **28**,  
754 1701-1721.
- 755 **Zhang Z, Guo X, Ge C, Ma Z, Jiang M, Li T, Koiwa H, Yang SW, Zhang X. 2017.** KETCH1  
756 imports HYL1 to nucleus for miRNA biogenesis in Arabidopsis. *Proc Natl Acad Sci USA*  
757 **114**, 4011-4016.
- 758 **Zipfel C, Robatzek S, Nabarro L, Oakeley EJ, Jones JDG, Felix G, Boller T. 2004.** Bacterial  
759 disease resistance in Arabidopsis through flagellin perception. *Nature* **428**, 764-766.

760 **Goto et al., Table 1**

761 **Table 1.** Peptide counts of PB1CP in FLAG-RBOHD Co-IP analysis.

762

| PB1CP peptides identification by co-immunoprecipitation of FLAG-RBOHD and LC-MS/MS Analysis |                         |             |                   |                   |
|---------------------------------------------------------------------------------------------|-------------------------|-------------|-------------------|-------------------|
| Treatment                                                                                   | Peptide Sequence        | Probability | Best Mascot Score | Number of Spectra |
| mock                                                                                        | (K)SDDWFLNALNSAGLLNR(G) | 100%        | 51.56             | 3                 |
| elf18                                                                                       | (K)SDDWFLNALNSAGLLNR(G) | 100%        | 40.03             | 2                 |
| elf18+flg22                                                                                 | (K)SDDWFLNALNSAGLLNR(G) | 100%        | 32.69             | 1                 |
|                                                                                             | (R)LLGLDDALALR(S)       | 99%         | 35.49             | 2                 |
|                                                                                             | (R)VHVEEPGGVR(T)        | 96%         | 20.71             | 1                 |

763

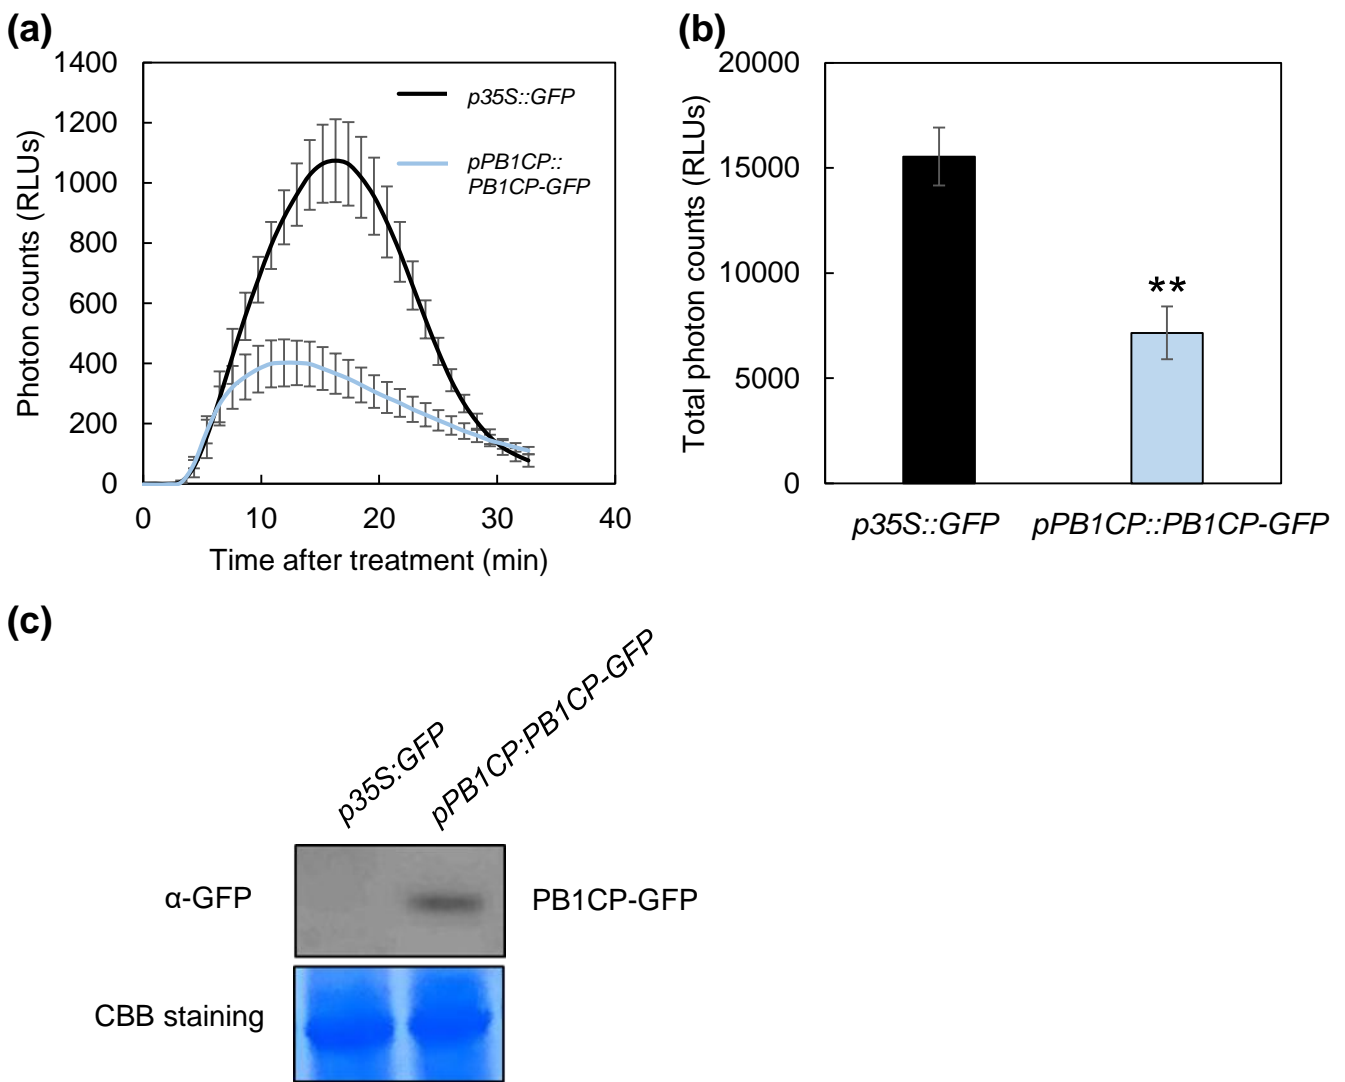

**Fig. 1** Heterologous expression of PB1CP-GFP under the native Arabidopsis promoter reduces flg22-induced ROS production in *N. benthamiana*. **(a, b)** The PB1CP-GFP (*pPB1CP::PB1CP-GFP*) and free GFP (*p35S::GFP*) were expressed in the same leaf by Agroinfiltration, and flg22-induced ROS was measured in a luminol-based assay. Thirty minute time-course **(a)** and the total amount **(b)** of flg22-induced ROS production. Experiments were performed three times. Asterisks indicate a significant difference based on Student's t-test (\*\* $p$ -value  $\leq 0.01$ ). **(c)** The protein expression of PB1CP-GFP was confirmed by immunoblot analysis with  $\alpha$ -GFP antibody (ab290; 1:8,000; Abcam).

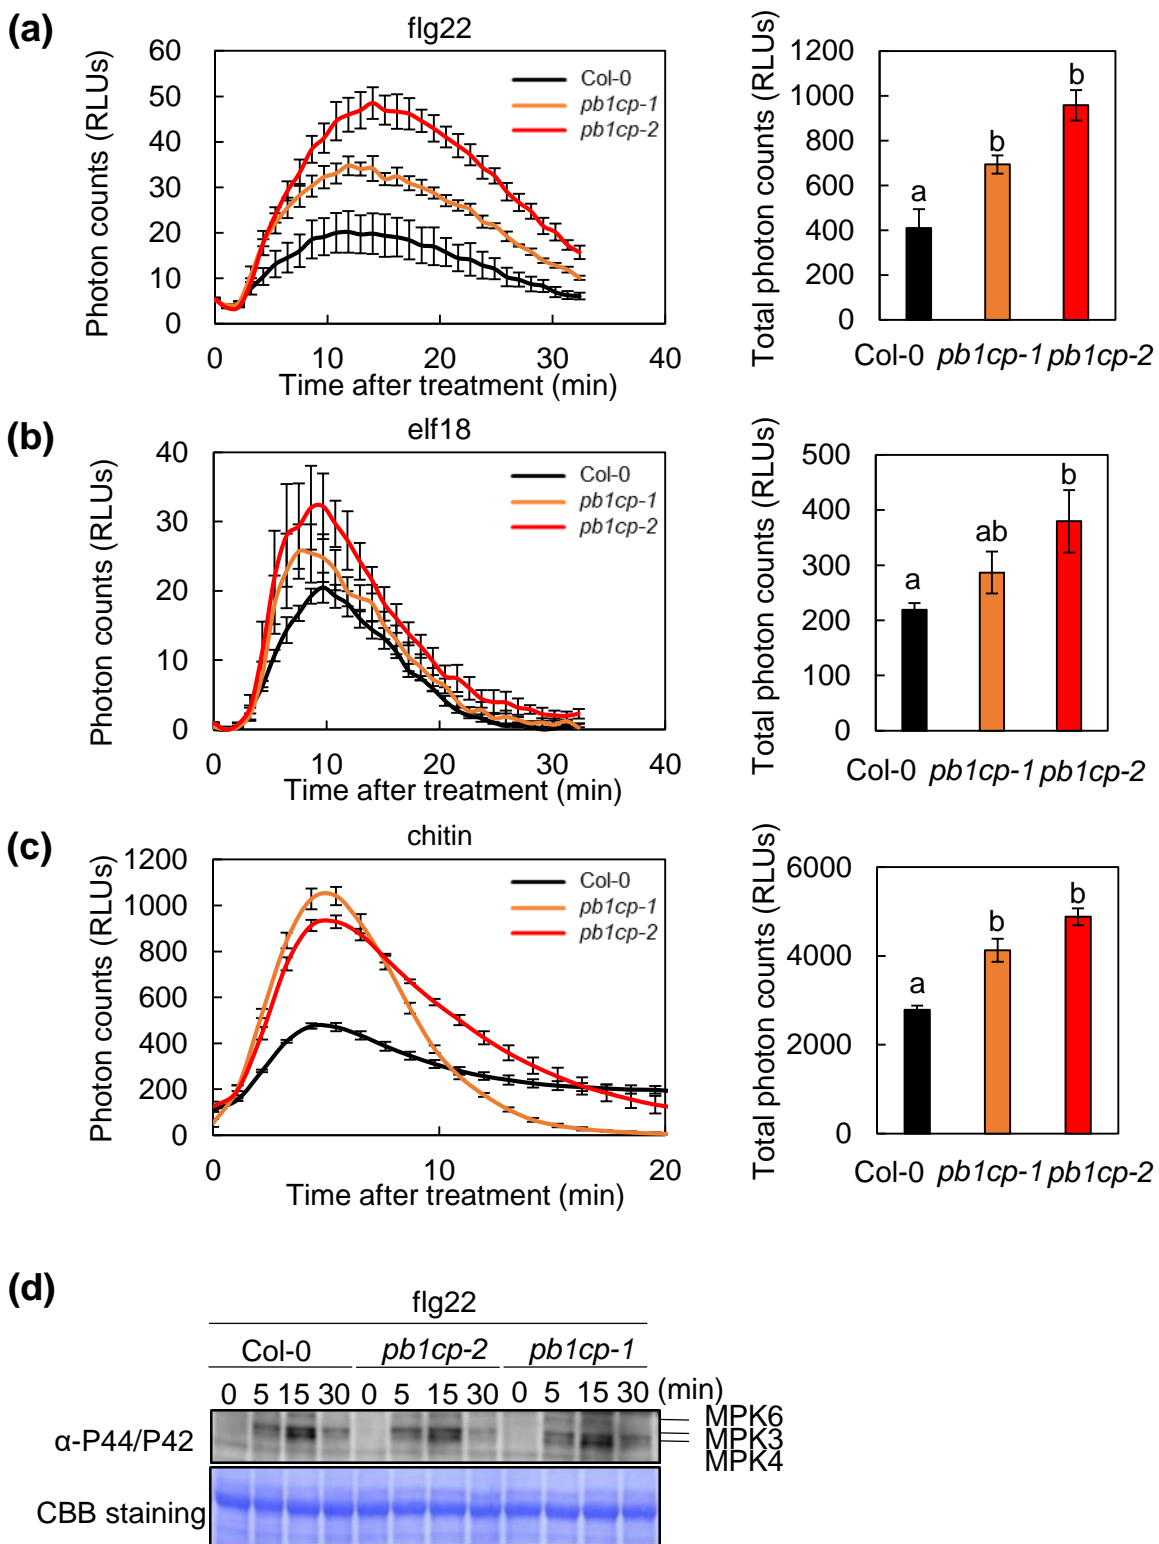

**Fig. 2** *pb1cp* mutants have higher PAMP-induced ROS production but normal MAPK activation. Thirty-minute time-course and total amount of ROS production with *flg22* (a), *elf18* (b), or chitin (c) treatments of *pb1cp* mutants. The leaf discs of five- to six-week-old Arabidopsis were used for ROS assays. Different characters indicate significant differences based on one-way ANOVA and Tukey's post hoc test ( $p$ -value  $\leq 0.05$ ). (d) *flg22*-induced activation of MAPKs in *pb1cp* mutants. Ten-day-old Arabidopsis seedlings were treated with *flg22* and phosphorylated MAPKs were detected on immunoblots with  $\alpha$ -phospho-p44/42 MAPK (Erk1/2) (Thr202/Tyr204) antibody (#4370; 1:2,000; Cell signaling Technology). Equal loading of protein samples is shown by CBB staining.

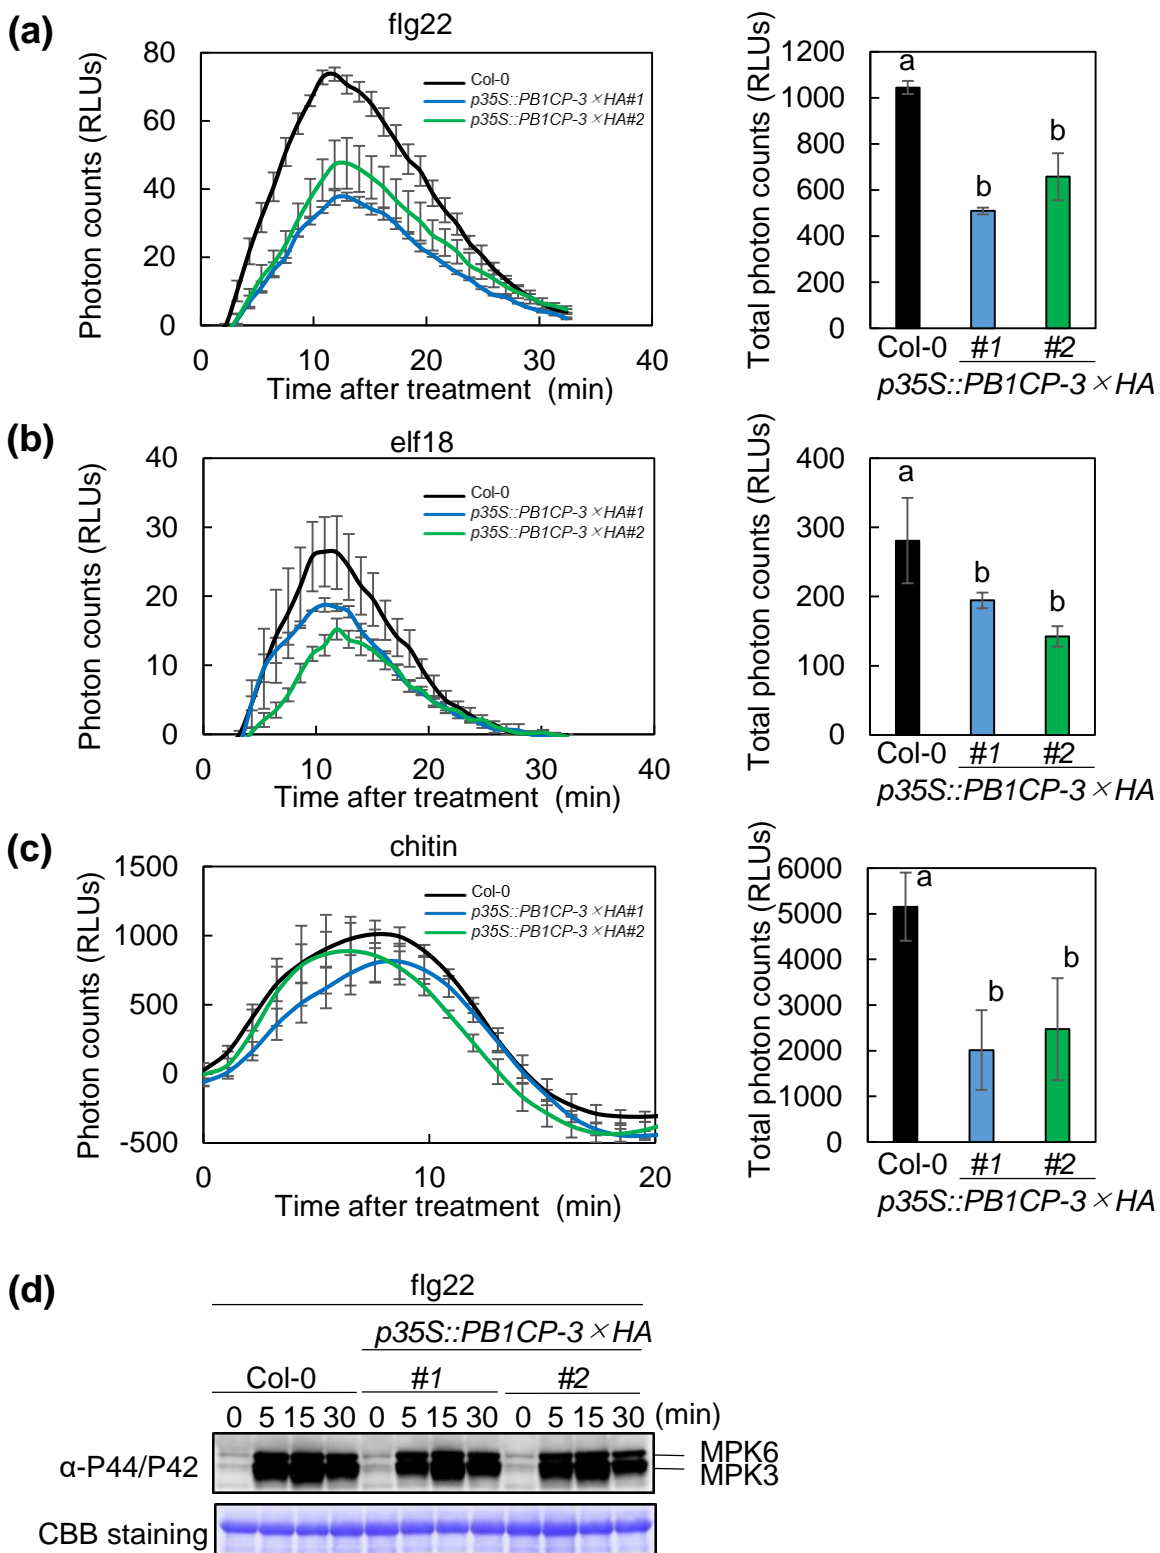

**Fig. 3** *PB1CP* overexpression lines have reduced PAMP-induced ROS production but normal MAPK activation. Thirty minute time-course and the total amount of ROS production with flg22 (a), elf18 (b), and chitin (c) treatment in *PB1CP* overexpression lines ( $p35S::PB1CP-3 \times HA$  #1 & #2). Leaf discs of five- to six-week-old Arabidopsis plants were used for ROS assays. Different characters indicate significant differences based on one-way ANOVA and Tukey's post hoc test ( $p$ -value  $\leq 0.05$ ). (d) flg22-induced activation of MAPKs in  $p35S::PB1CP-3 \times HA$  lines. Ten-day-old Arabidopsis seedlings were treated with flg22, and phosphorylated MAPKs were detected on immunoblots with  $\alpha$ -phospho-p44/42 MAPK (Erk1/2) (Thr202/Tyr204) antibody (#4370; 1:2,000; Cell signaling Technology). Equal loading of protein samples is shown by CBB staining.

**(a)**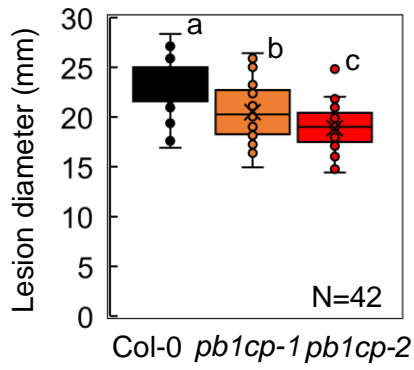**(b)**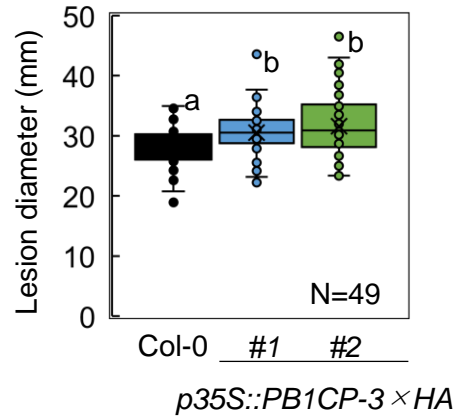

**Fig. 4** PB1CP suppresses resistance against *Colletotrichum higginsianum*. Diameters of necrotic lesions caused by *C. higginsianum* infection of *pb1cp* mutants (a) and in *PB1CP* overexpression lines (*p35S::PB1CP-3 × HA* #1 and #2) (b). Leaves of four-week-old soil-grown *Arabidopsis* plants were drop-inoculated with *C. higginsianum*.



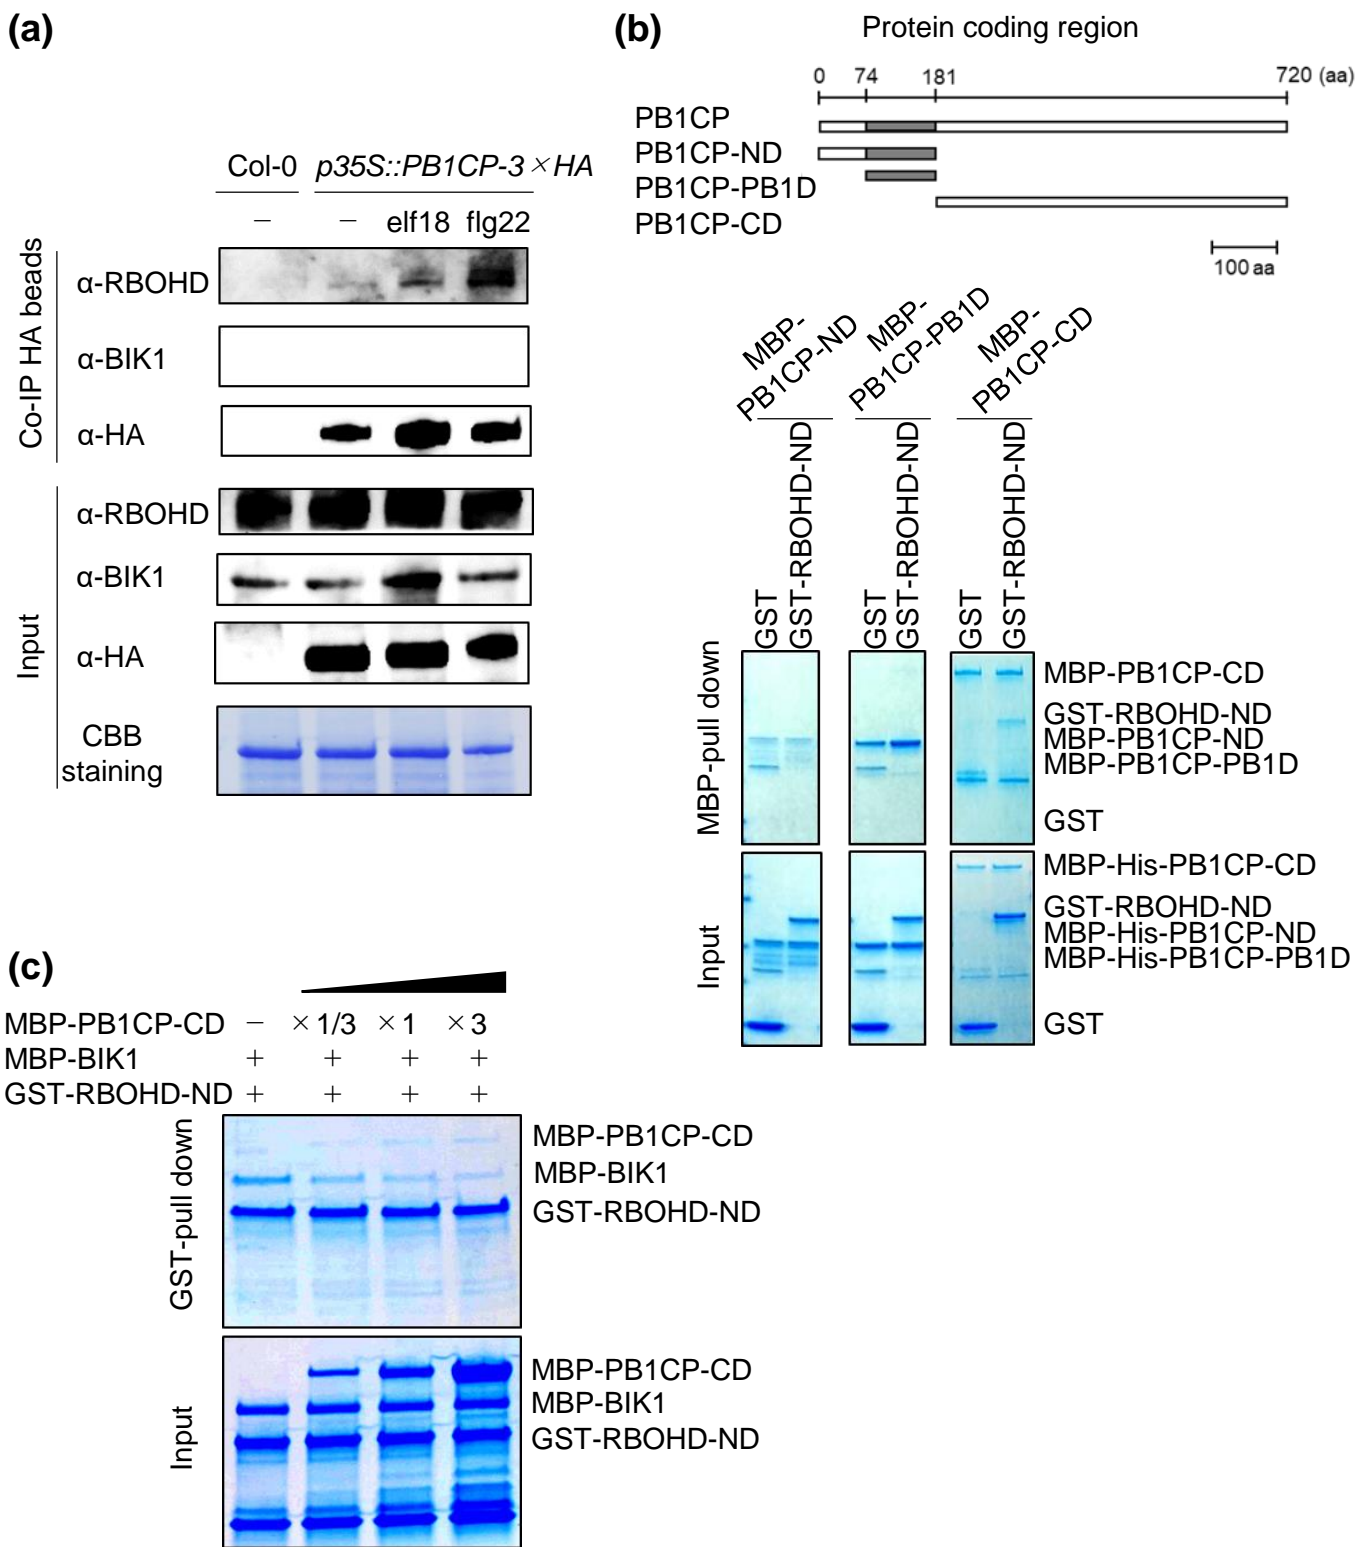

**Fig. 5** Treatment with elf18 or flg22 enhances PB1CP-RBOHD binding. **(a)** Co-immunoprecipitation of PB1CP and RBOHD in Arabidopsis. Stable transgenic Arabidopsis seedlings *p35S::PB1CP-3* × HA or Col-0 were treated with flg22 or elf18 for 10 min. Untreated plants (-) served as controls. Total proteins (input) were immunoprecipitated with α-HA magnetic beads followed by immunoblots with α-HA (3F10; 1:5,000, Roche), α-BIK1 (AS164030; 1:1,000; Agrisera), α-RBOHD (AS152962; 1:1,000; Agrisera) antibodies. Wild type Col-0 served as a negative control. **(b)** PB1CP-CD directly interacts with RBOHD-ND *in vitro*. MBP-PB1CP-ND, MBP-PB1CP-PB1D (PB1 domain), or MBP-PB1CP-CD were incubated with GST-RBOHD-ND or GST and with MBP. Input and pull-down proteins were separated by SDS-PAGE and stained with CBB. **(c)** PB1CP competes with BIK1 for binding to RBOHD. MBP-BIK1 was incubated with GST-RBOHD-ND with increasing amounts of MBP-PB1CP-CD, and pulled down with GST. All experiments were performed more than three times with similar results.

(a) *pPB1CP::PB1CP-GFP*

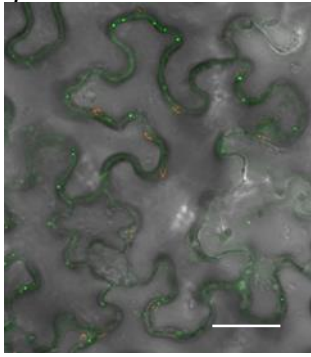

(b) *pPB1CP::PB1CP-GFP*

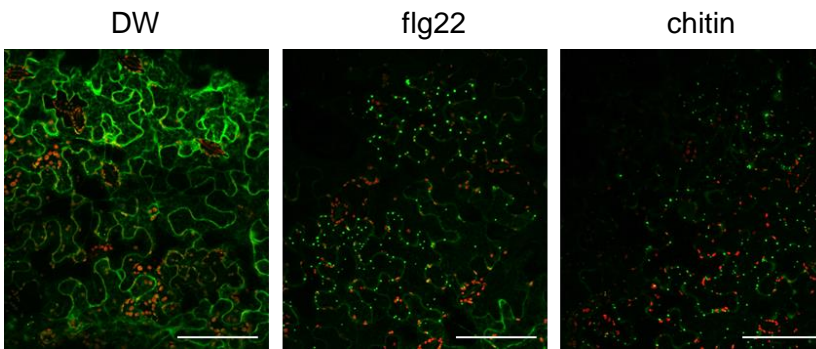

Stacking images

(c) *pPB1CP::PB1CP-GFP* (with FM4-64 dye)

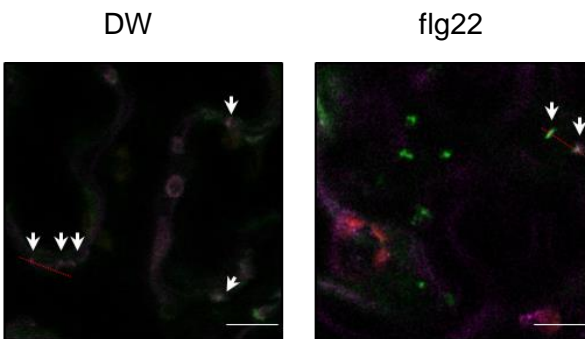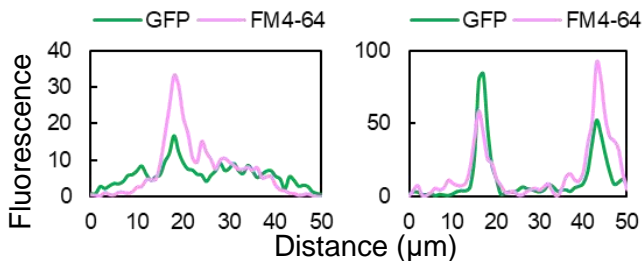

**Fig. 6** Subcellular localization of PB1CP in *N. benthamiana*. (a) Subcellular localization of PB1CP-GFP expressed under its native promoter in *N. benthamiana*. A white bar = 50  $\mu\text{m}$ . (b) PAMPs (flg22 and chitin) induced the formation of PB1CP signal foci. PB1CP-GFP was expressed in *N. benthamiana* under the control of its native promoter. Leaf disks were treated with DW or 10  $\mu\text{M}$  flg22 or 100  $\mu\text{M}$  chitin for 3 h. White bars = 100  $\mu\text{m}$ . (c) Co-localization of PB1CP-GFP and FM4-64 signals in cytoplasmic endomembrane compartments after treatment with flg22. Fluorescence intensities of PB1CP-GFP were quantified at 500 - 540 nm and FM4-64 at 558 - 734 nm. Transections used for fluorescence intensity measurements are indicated by the red dash line. White bars = 30  $\mu\text{m}$ .

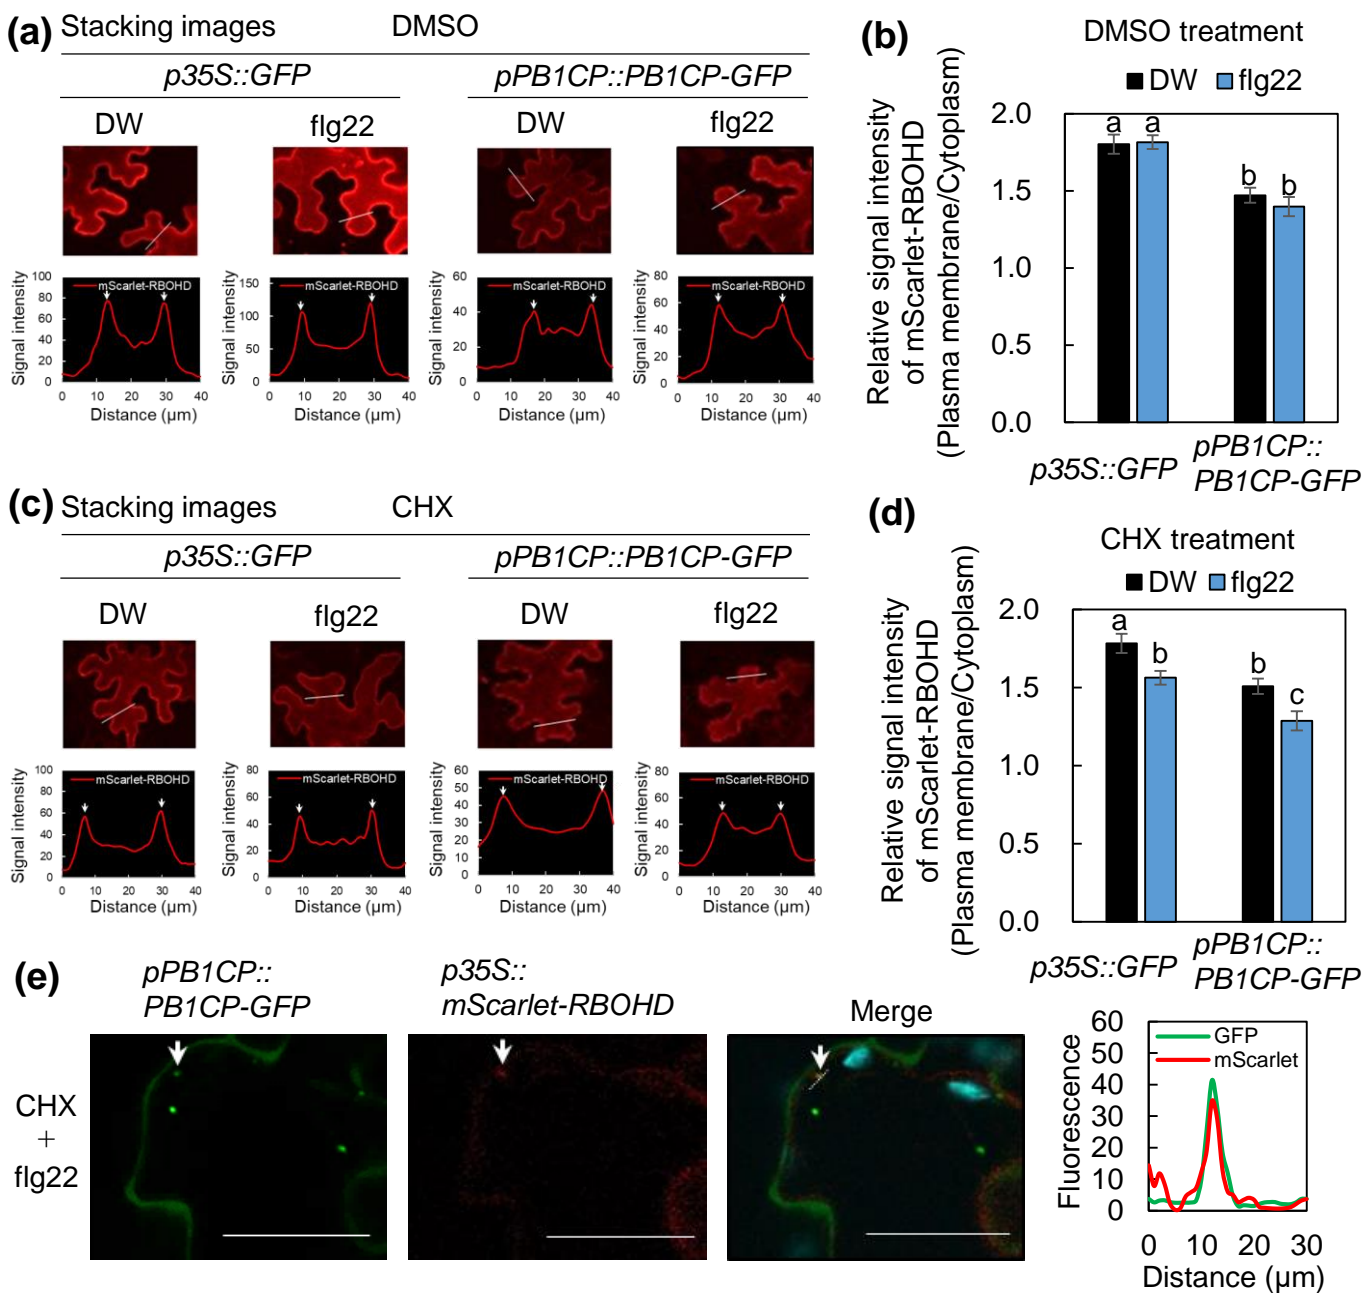

**Fig. 7** PB1CP reduces localization of RBOHD at the plasma membrane. **(a)** Localization of mScarlet-RBOHD (*p35S::mScarlet-RBOHD*) with co-expression of PB1CP-GFP (*pPB1CP::gPB1CP-GFP*) or GFP (*p35S::PB1CP-GFP*) in *N. benthamiana* after treatment with flg22. Distilled water served as treatment control. Fluorescence of mScarlet-RBOHD were measured at 559 - 595 nm. Transections used for fluorescence intensity measurements are indicated by broken white lines. **(b)** Intensity ratio of mScarlet-RBOHD at the plasma membrane to mScarlet-RBOHD at the cytoplasm. The data were extracted from ten cells from mScarlet-RBOHD image stacks. **(c)** Localization of mScarlet-RBOHD with co-expression of PB1CP-GFP or GFP after treatment with 300  $\mu$ M CHX. Transections used for fluorescence intensity measurements are indicated by dashed white lines. **(d)** The intensity ratio of mScarlet-RBOHD at the plasma membrane to the cytoplasm after treatment with 300  $\mu$ M CHX. The data was extracted from ten cells from mScarlet-RBOHD image stacks. Different letters indicate significantly different values at  $**p \leq 0.05$  (one-way ANOVA, Turkey's *post hoc* test). Experiments were performed more than three times with similar results. **(e)** Co-localization of PB1CP-GFP and mScarlet-RBOHD signals in the endomembrane compartments in the cytoplasm after treatment with 300  $\mu$ M CHX and 10  $\mu$ M flg22. Fluorescence intensities of PB1CP-GFP were measured at 500 - 540 nm and mScarlet-RBOHD was measured at 559 - 595 nm. Transections used for fluorescence intensity measurements are indicated by the white dashed line. White bars = 100  $\mu$ m.

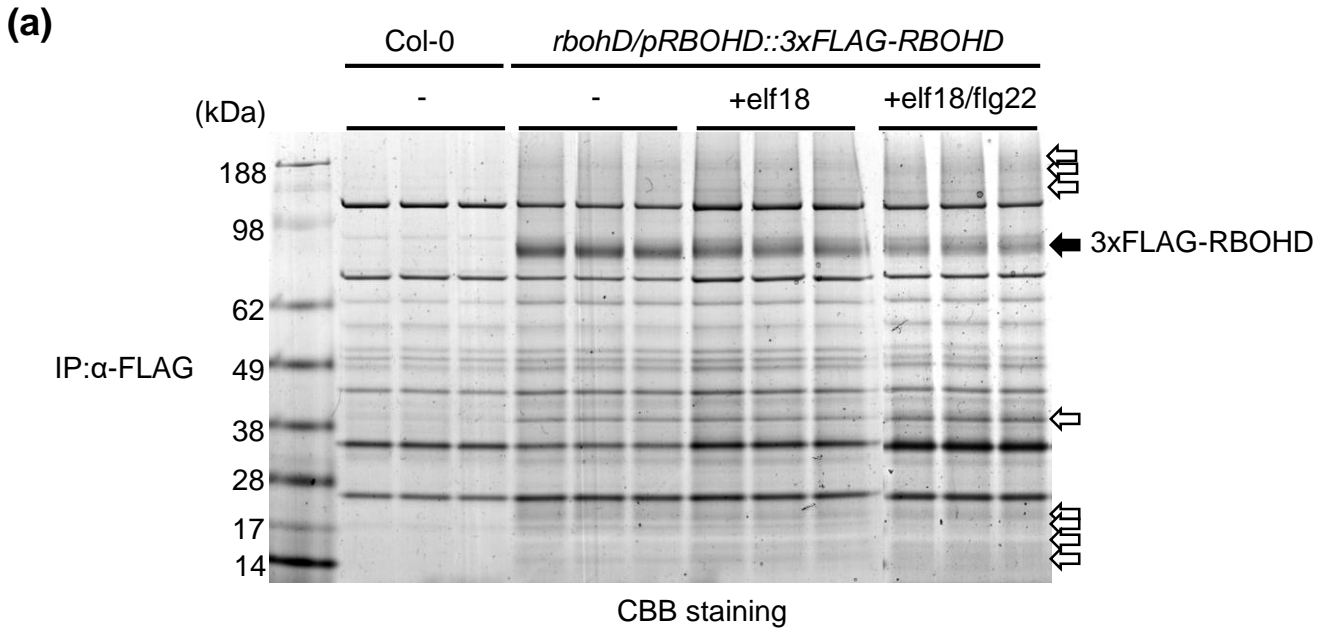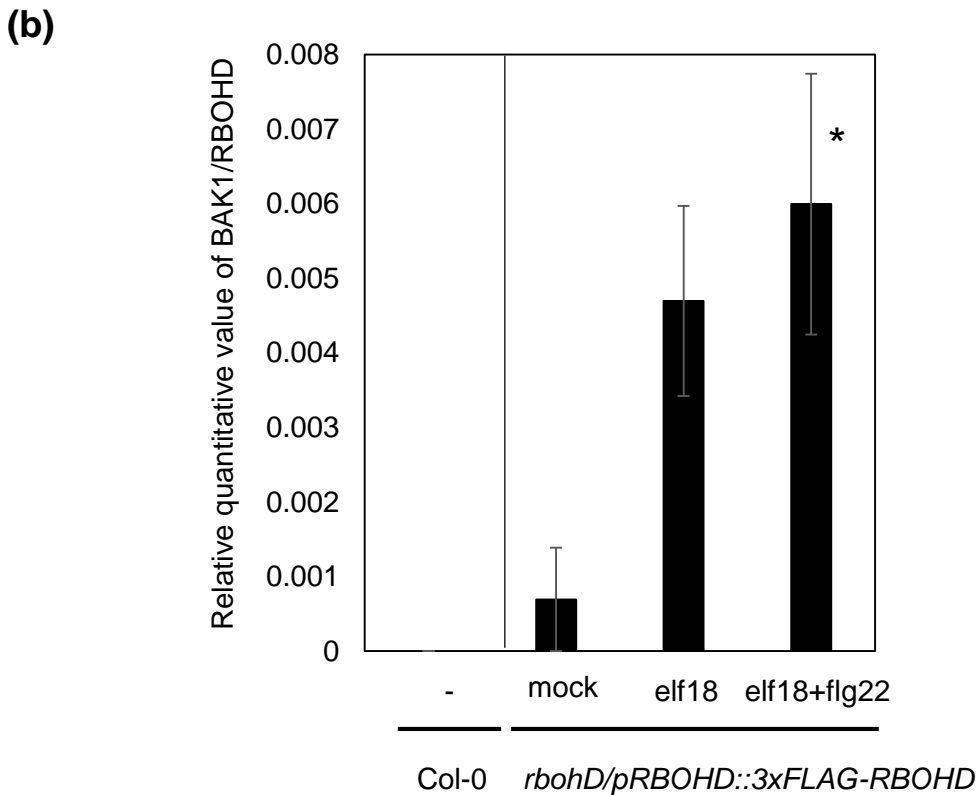

**Fig. S1** Co-immunoprecipitation of 3×FLAG-RBOHD to identify RBOHD-associated proteins. **(a)** SDS-PAGE gel of proteins enriched by α-FLAG immunoprecipitation stained with CBB. Co-immunoprecipitation with α-FLAG beads was performed using stable transgenic Arabidopsis plants expressing 3×FLAG-RBOHD under the control of its native promoter (*rbohD/pRBOHD::3×FLAG-RBOHD*) after treatment with DW, 1 μM elf18, or 1 μM elf18 and 1 μM flg22 simultaneously for 10 min. Non-transformed wild type Col-0 was used as a negative control. Black arrow indicates the 3×FLAG-RBOHD band. White arrows indicate proteins that specifically eluted with 3×FLAG-RBOHD. **(b)** Treatment with elf18 or elf18+flg22 increased the binding of BAK1 with RBOHD. BAK1 values were normalized against RBOHD. Data are means ± SE of three biological replicates. The asterisk indicates significant differences among mock, elf18 and elf18+flg22 samples at \* $p \leq 0.05$  (one-way ANOVA, Dunnett's post hoc test).

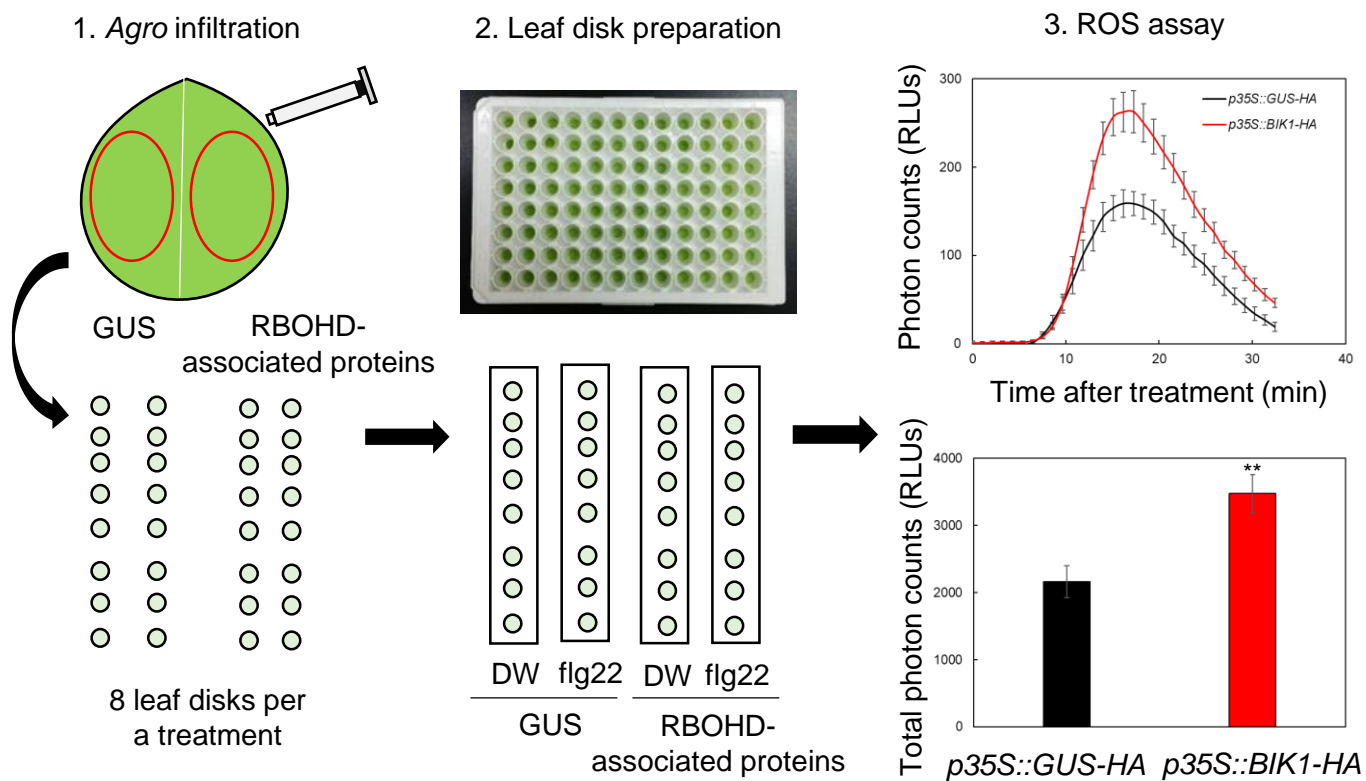

**Fig. S2** Rapid functional analyses of RBOHD-associated proteins in *N. benthamiana*. RBOHD-associated proteins fused with 3×HA at the C-terminus or BIK1-HA (positive control) and GUS-HA (negative control) were expressed under the control of the CaMV 35S promoter in the same leaf of *N. benthamiana* by Agroinfiltration. 30 min time-course and total amount of flg22-induced ROS were measured by luminol-based assays. Experiments were performed four times with similar results.

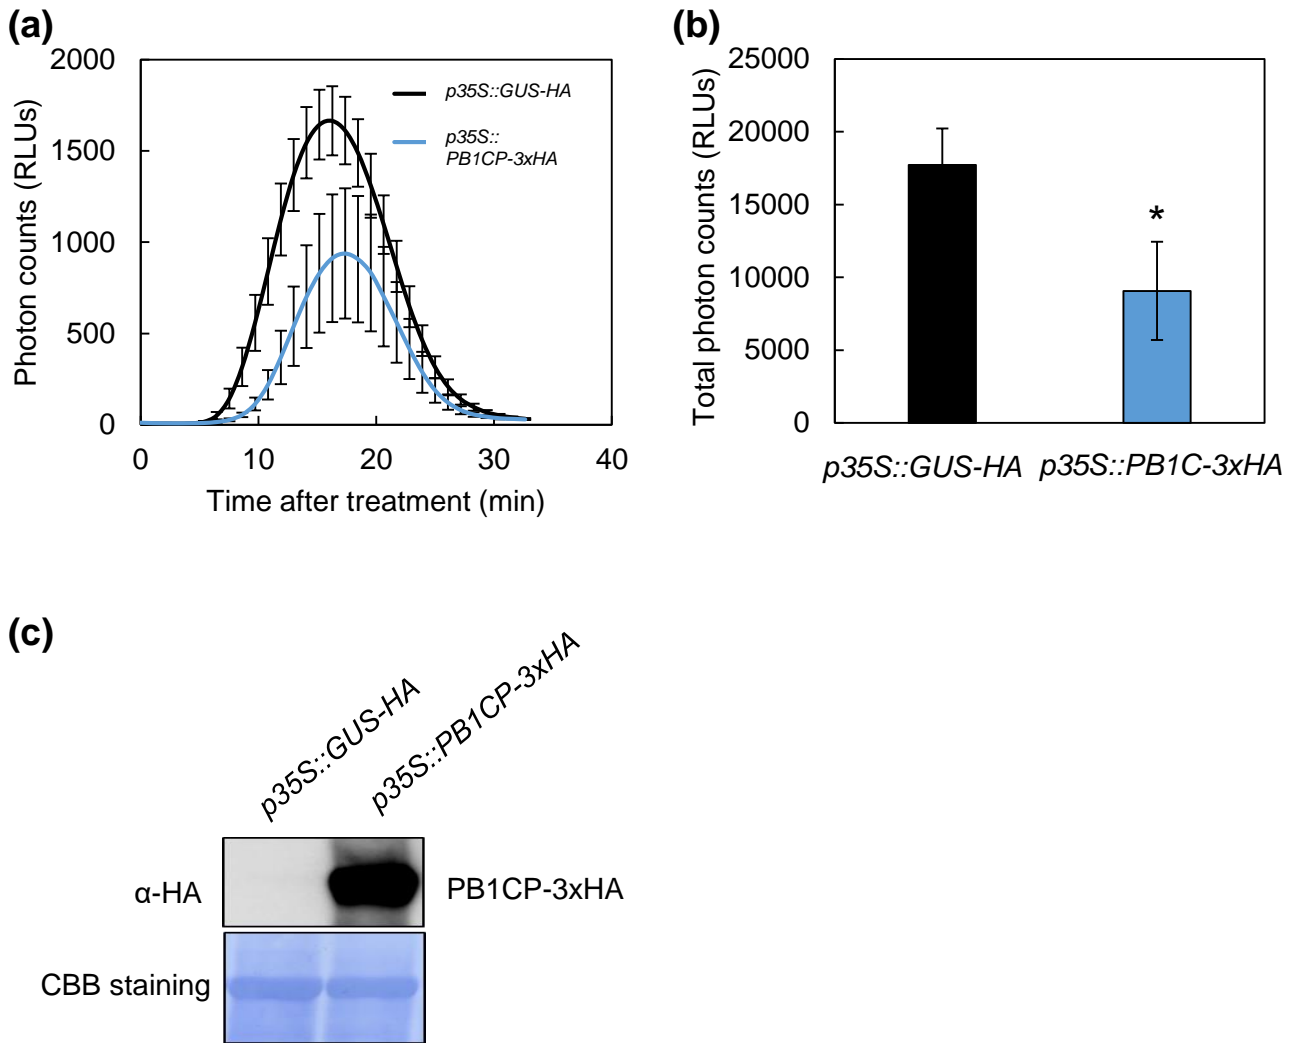

**Fig. S3** PB1CP inhibits flg22-induced ROS production in *N. benthamiana*. *PB1CP-3 × HA* and *GUS-HA* were expressed under the CaMV 35S promoter in the same leaf by Agrobacterium infiltration, and flg22-induced ROS was measured in a luminol-based assay. Thirty-minute time-course (a) and the total amount (b) of flg22-induced ROS production. Experiments were performed three times with similar results. Asterisks indicate significant differences based on Student's t-test ( $p$ -value  $\leq 0.05$ ). (c) Protein expression of PB1CP-3xHA was confirmed by immunoblots with  $\alpha$ -HA antibody (3F10; 1:5,000; Roche).



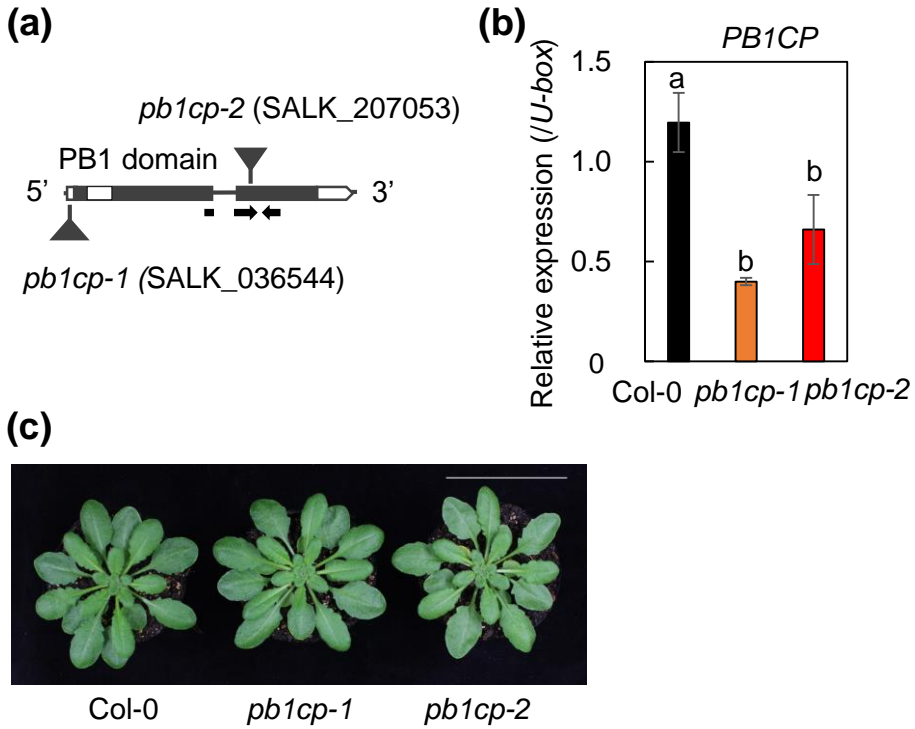

**Fig. S4** T-DNA insertion and expression in *pb1cp* mutants. **(a)** Positions of T-DNA insertions within the *PB1CP* locus in *pb1cp-1* (SALK\_036544) and *pb1cp-2* (SALK\_207053) alleles. **(b)** Transcript levels of *PB1CP* in the *pb1cp* mutants were measured by Quantitative RT-PCR (RT-qPCR) after normalization to the *U-box* housekeeping gene transcript (*At5g15400*). Different letters indicate significant differences at  $**p \leq 0.01$  (one-way ANOVA, Turkey's *post hoc* test). **(c)** Phenotype of 6 week-old wild type and *pb1cp* mutants. A white bar = 5 cm.



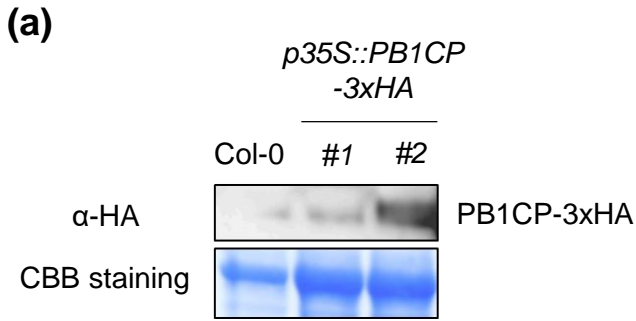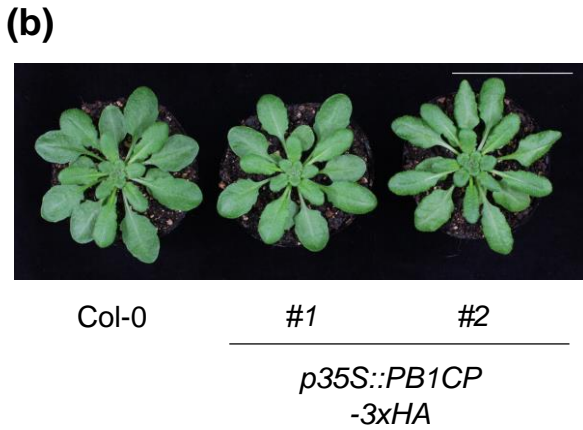

**Fig. S5** Expression in *PB1CP* overexpression lines. **(a)** PB1CP-3×HA protein in *p35S::PB1CP-3×HA* lines. **(b)** Phenotype of wild type and *p35S::PB1CP-3×HA* lines. Fourteen-day-old Arabidopsis seedlings were used to measure PB1CP-3×HA protein expression. PB1CP protein was detected with α-HA antibody (3F10; 1:5,000; Roche). Protein loading was visualized by CBB staining. A white bar = 5 cm.

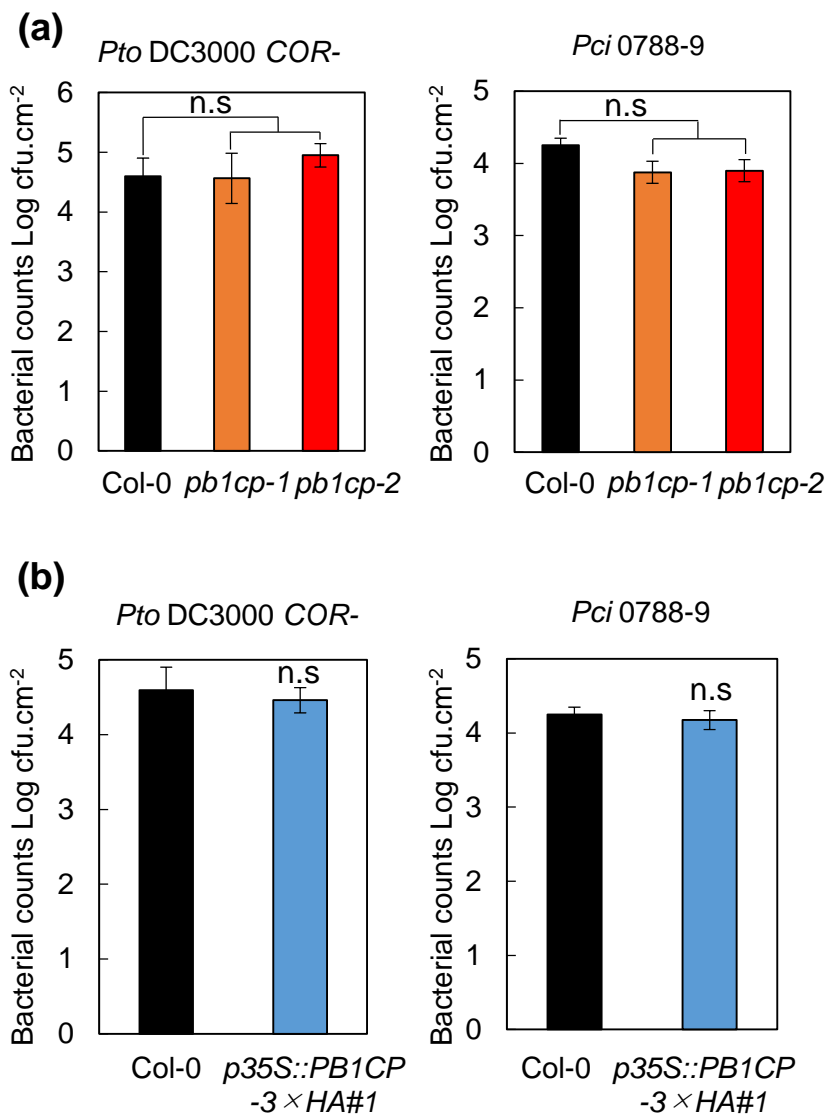

**Fig. S6** *pb1cp* mutants and *PB1CP* overexpression lines do not show defects in resistance against bacteria. *Pseudomonas syringae* pv. *tomato* DC3000 (*Pto* DC3000) lacking the toxin coronatine (*COR*) (OD600 = 0.02) or *Pseudomonas syringae* pv. *cilantro* (*Pci*) 0788-9 (OD600 = 0.02) were sprayed onto leaf surfaces of *pb1cp* mutants (**a**) and *p35S::PB1CP-3xHA* lines (**b**), and plants were maintained uncovered. Bacterial numbers (cfu) were determined 3 days post-inoculation. Values are means  $\pm$  SE of six biological replicates.

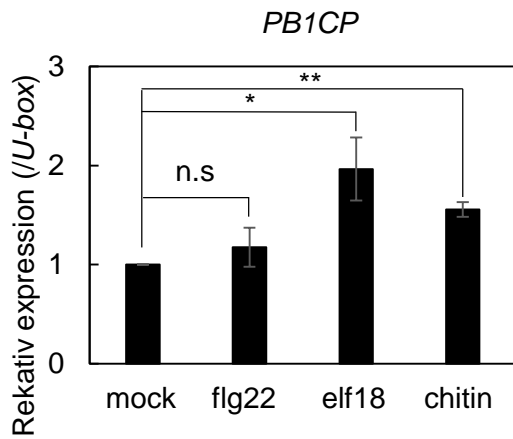

**Fig. S7** elf18 and chitin, but not flg22 weakly induce the accumulation of *PB1CP*. Transcript levels of *PB1CP* in Arabidopsis seedlings after treatment with DW (mock), 1  $\mu$ M flg22, 1  $\mu$ M elf18, or 10  $\mu$ M chitin were measured by RT-qPCR after normalization to *PUB* housekeeping gene transcription (*At5g15400*). Data are means  $\pm$  SE of three biological replicates. Asterisks indicate significant differences from mock treatment (Student's t-test, \* $p \leq 0.05$ ; \*\* $p \leq 0.01$ ).

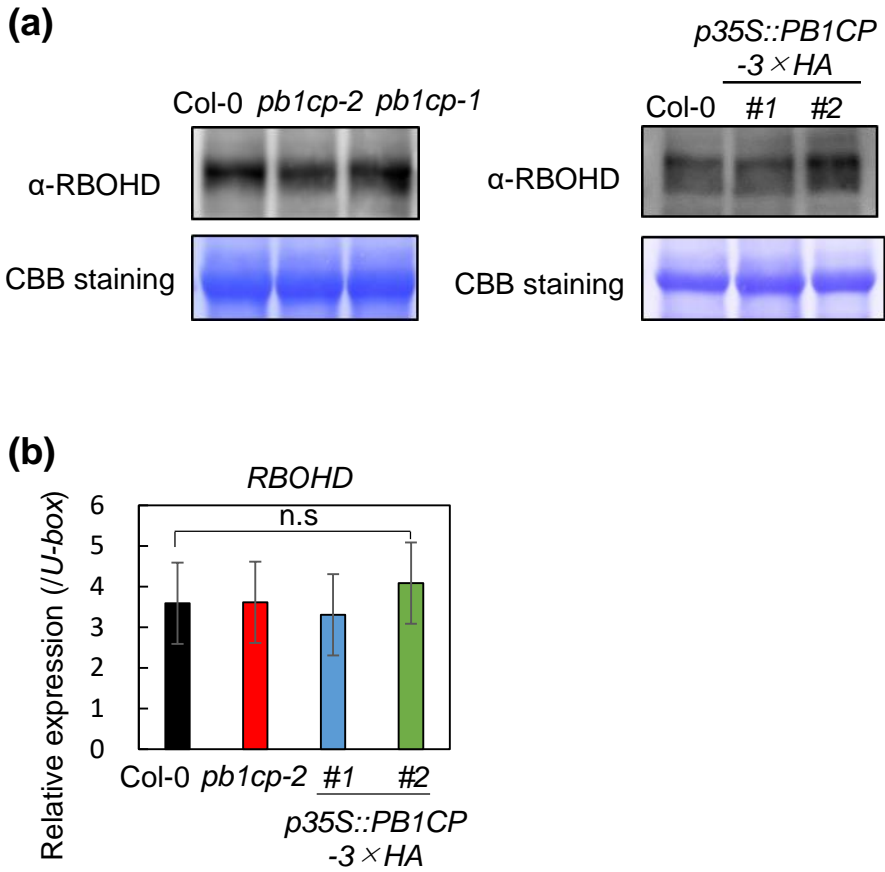

**Fig. S8** PB1CP does not affect expression of RBOHD. **(a)** Immunoblots of RBOHD protein in *pb1cp* mutants and *p35S::PB1CP-3×HA* lines. RBOHD protein was detected with α-RBOHD antibody (AS152962; 1:1,000; Agrisera). The equal loading of protein samples was shown by CBB staining. **(b)** Transcript levels of *RBOHD* in *pb1cp* mutants and *p35S::PB1CP-3×HA* lines were measured by RT-qPCR after normalization to the *PUB* housekeeping gene (*At5g15400*). Data are means ± SE of three biological replicates.

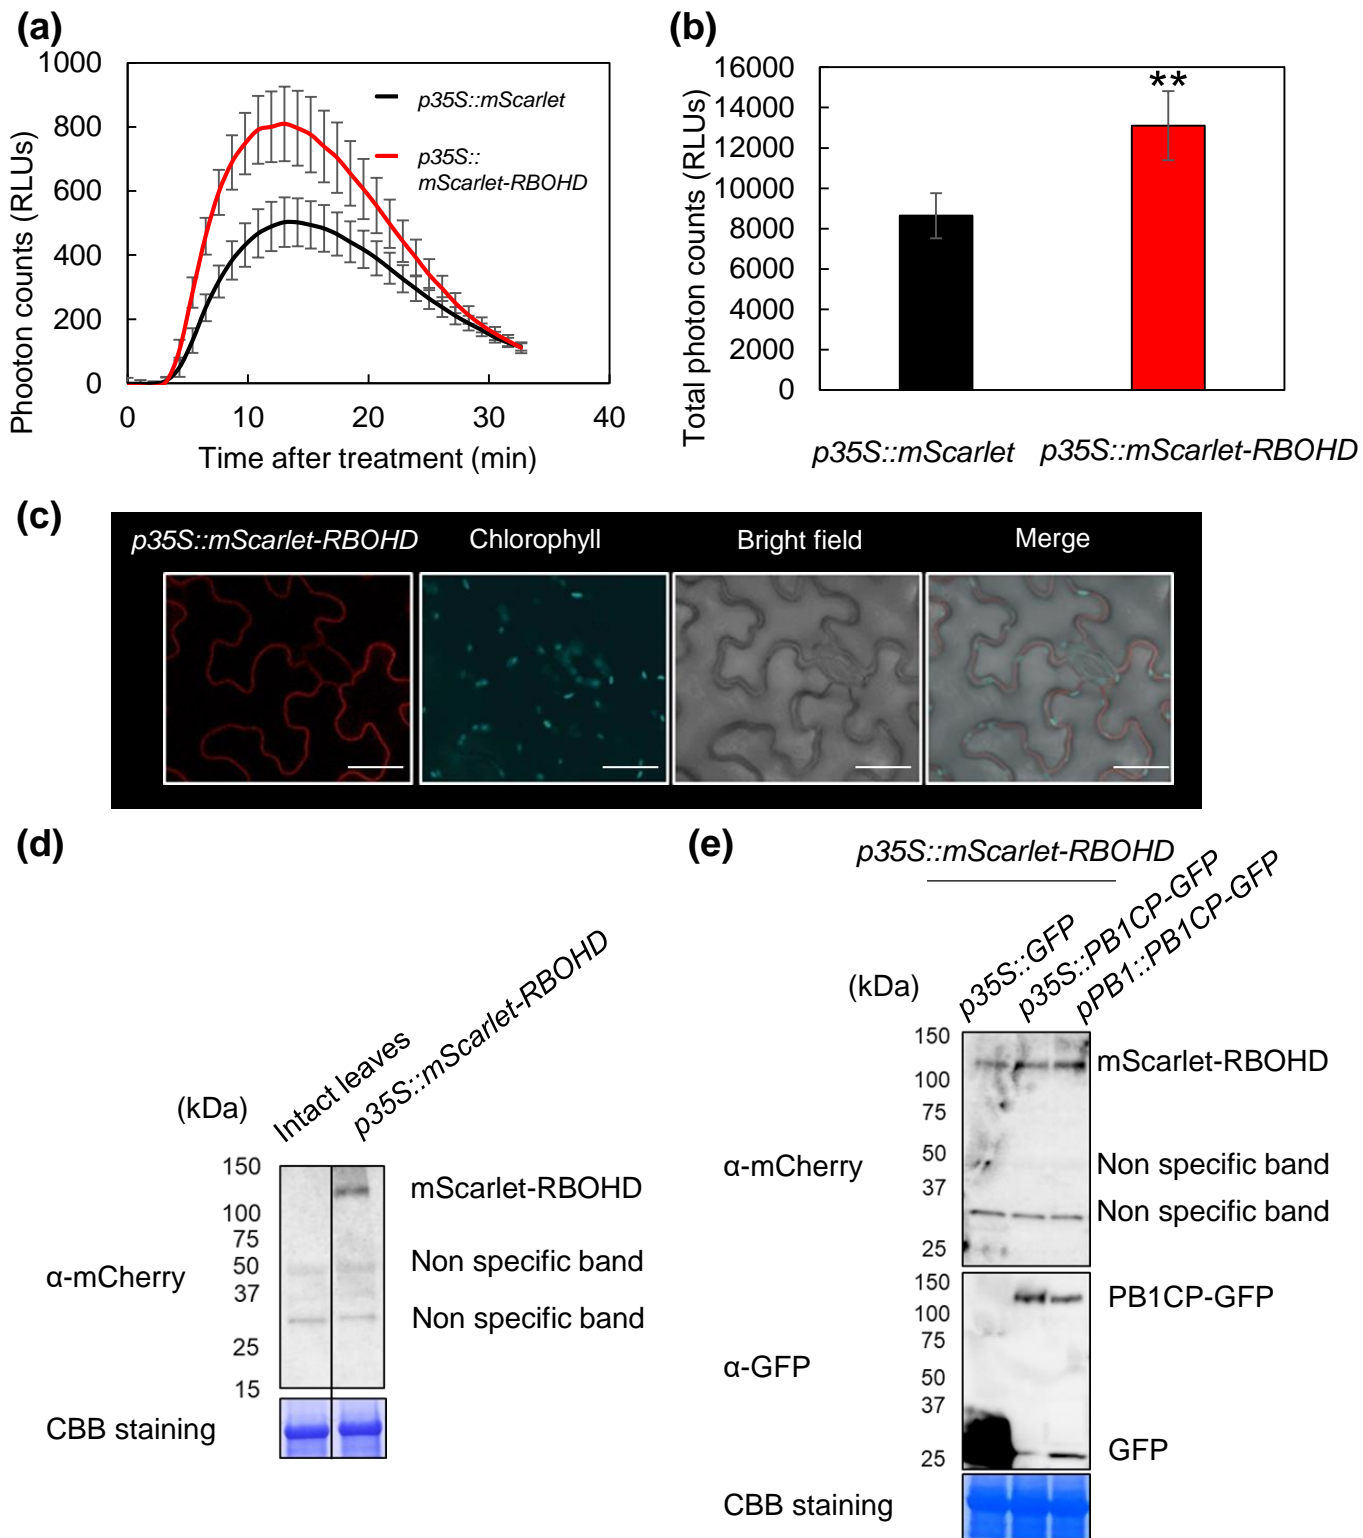

**Fig. S9** *mScarlet-RBOHD* is functional and is localized at the plasma membrane. **(a, b)** The overexpression of *mScarlet-RBOHD* increased flg22-induced ROS production in *N. benthamiana*.

*mScarlet-RBOHD* and *mScarlet* were expressed under the CaMV 35S promoter in the same leaf by Agroinfiltration. ROS production was measured by luminol-based assay. Thirty minute time-course **(a)** and the total amount **(b)** of flg22-induced ROS production. The asterisk indicates significant differences at  $**p \leq 0.01$  (Student's t-test). Experiments were performed three times with similar results. **(c)** Localization of *mScarlet-RBOHD* expressed under control of the CaMV 35S promoter (*p35S::mScarlet-RBOHD*) and chlorophyll autofluorescence. White bars = 30  $\mu$ m.

**(d, e)** The protein expression of *mScarlet-RBOHD* (*p35S::mScarlet-RBOHD*) and *PB1CP-GFP* (*p35S::PB1CP-GFP*, *pPB1::PB1CP-GFP*) in *N. benthamiana* were confirmed by immunoblots with  $\alpha$ -mCherry (ab167453; 1:1,000; Abcam) and  $\alpha$ -GFP (ab290; 1:8,000; Abcam) antibodies.

### PAMP-induced RBOHD activation

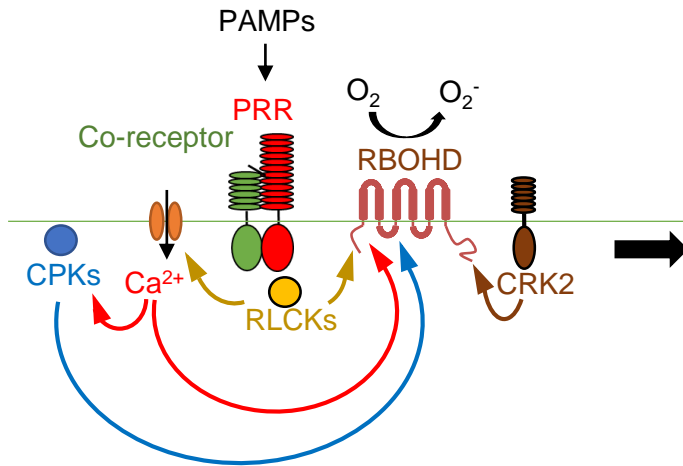

- (1) RLCKs-mediated phosphorylation
- (2) Ca<sup>2+</sup> interaction to EF-hand motif
- (3) CPKs-mediated phosphorylation
- (4) CRK2-mediated phosphorylation

### PB1CP-mediated down regulation of RBOHD

- (1) PB1CP competes with BIK1 for the interaction with RBOHD

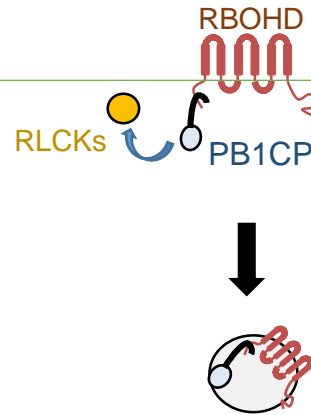

- (2) PB1CP induces relocalization of RBOHD to the endomembrane compartments

**Fig. S10.** A model for PAMP-induced RBOHD activation and PB1CP-mediated RBOHD down-regulation during PTI. The left figure shows the RBOHD activation model during PTI. Upon PAMP perception, PRRs and co-receptors directly phosphorylate and activate RLCKs. The phosphorylated RLCKs bind the N-terminal domain of RBOHD and phosphorylate it on several specific sites (1). The RLCKs-mediated phosphorylation would mediate the Ca<sup>2+</sup>-based regulation of RBOHD by inducing conformational changes that could lead to increased Ca<sup>2+</sup> binding affinity for EF-hand motifs and/or increased accessibility for CPK-mediated phosphorylation (2). At the same time, motif in RBOHD and also activation of CPKs, which phosphorylates the N-terminal domain of RBOHD (3). The produced ROS would trigger further activation of Ca<sup>2+</sup> channel(s), leading to the full activation of Ca<sup>2+</sup> signaling and Ca<sup>2+</sup>-based regulation of RBOHD. Furthermore, CRK2 binds the C-terminal domain of RBOHD and phosphorylates it on several specific sites (4). The right figure shows the PB1CP-mediated RBOHD down-regulation model during PTI. Upon PAMP perception, PB1CP competes with BIK1 for the binding with the N-terminal domain of RBOHD (1). PB1CP also induces relocalization of RBOHD to the endomembrane compartments (2).
